# Supplementary material for: Expeditious synthesis of (±)-diethyl 2-alkyl- and 2-aryl-(3-oxoisoindolin-1-yl)phosphonates catalysed by OSU-6
Source: Royal Society of Chemistry journal article supplement (doi:10.1039/c5ra02307f), 2015-01-01

## **Expeditious synthesis of (±)-diethyl 2-alkyl- and 2-aryl-(3-oxoisindolin-1-yl)phosphonates using OSU-6 catalyst**

Nagendra Prasad Muddala, Baskar Nammalwar, Richard A. Bunce\*

Department of Chemistry, Oklahoma State University, Stillwater, OK 74078-3071, USA

### **Supporting Information**

#### **Table of Contents**

|                                                                             |       |
|-----------------------------------------------------------------------------|-------|
| Experimental section.....                                                   | 3     |
| Representative procedure for phosphonate synthesis .....                    | 3     |
| Spectral data .....                                                         | 3-12  |
| Procedure to regenerate OSU-6 .....                                         | 12    |
| Copies of spectra                                                           |       |
| <sup>1</sup> H- and <sup>13</sup> C-NMR spectra of compound <b>3a</b> ..... | 13-14 |
| <sup>1</sup> H- and <sup>13</sup> C-NMR spectra of compound <b>3b</b> ..... | 15-16 |
| <sup>1</sup> H- and <sup>13</sup> C-NMR spectra of compound <b>3c</b> ..... | 17-18 |
| <sup>1</sup> H- and <sup>13</sup> C-NMR spectra of compound <b>3d</b> ..... | 19-20 |
| <sup>1</sup> H- and <sup>13</sup> C-NMR spectra of compound <b>3e</b> ..... | 21-22 |
| <sup>1</sup> H- and <sup>13</sup> C-NMR spectra of compound <b>3f</b> ..... | 23-24 |
| <sup>1</sup> H- and <sup>13</sup> C-NMR spectra of compound <b>3g</b> ..... | 25-26 |
| <sup>1</sup> H- and <sup>13</sup> C-NMR spectra of compound <b>3h</b> ..... | 27-28 |
| <sup>1</sup> H- and <sup>13</sup> C-NMR spectra of compound <b>3i</b> ..... | 29-30 |
| <sup>1</sup> H- and <sup>13</sup> C-NMR spectra of compound <b>3j</b> ..... | 31-32 |
| <sup>1</sup> H- and <sup>13</sup> C-NMR spectra of compound <b>3k</b> ..... | 33-34 |
| <sup>1</sup> H- and <sup>13</sup> C-NMR spectra of compound <b>3l</b> ..... | 35-36 |
| <sup>1</sup> H- and <sup>13</sup> C-NMR spectra of compound <b>3m</b> ..... | 37-38 |
| <sup>1</sup> H- and <sup>13</sup> C-NMR spectra of compound <b>3n</b> ..... | 39-40 |
| <sup>1</sup> H- and <sup>13</sup> C-NMR spectra of compound <b>3o</b> ..... | 41-42 |
| <sup>1</sup> H- and <sup>13</sup> C-NMR spectra of compound <b>3p</b> ..... | 43-44 |

|                                                                             |       |
|-----------------------------------------------------------------------------|-------|
| $^1\text{H}$ - and $^{13}\text{C}$ -NMR spectra of compound <b>3q</b> ..... | 45-46 |
| $^1\text{H}$ - and $^{13}\text{C}$ -NMR spectra of compound <b>3r</b> ..... | 47-48 |
| $^1\text{H}$ - and $^{13}\text{C}$ -NMR spectra of compound <b>3s</b> ..... | 49-50 |
| $^1\text{H}$ - and $^{13}\text{C}$ -NMR spectra of compound <b>3t</b> ..... | 51-52 |
| $^1\text{H}$ - and $^{13}\text{C}$ -NMR spectra of compound <b>3u</b> ..... | 53-54 |
| $^1\text{H}$ - and $^{13}\text{C}$ -NMR spectra of compound <b>3v</b> ..... | 55-56 |
| $^1\text{H}$ - and $^{13}\text{C}$ -NMR spectra of compound <b>3w</b> ..... | 57-58 |

## Experimental Section

**General.** Commercial reagents were used directly as received. Reactions were monitored by thin layer chromatography (TLC) on silica gel GF plates (Analtech, No. 21521) and visualized using a hand-held UV lamp. Melting points were uncorrected. FT-IR spectra were run as dichloromethane solutions on NaCl disks.  $^1\text{H}$  and  $^{13}\text{C}$  NMR spectra were measured at 400 MHz or 100 MHz, respectively, in  $\text{CDCl}_3$ . Chemical shifts ( $\delta$ ) are referenced to internal  $(\text{CH}_3)_4\text{Si}$  and coupling constants ( $J$ ) are given in Hz. High-resolution mass spectra (HRMS) were determined using a Thermo LTQ-OrbitrapXL mass spectrometer.

### Representative procedure to prepare ( $\pm$ )-diethyl 2-alkyl and 2-aryl-(3-oxoisindoline-1-yl)phosphonates **3**:

To a stirred solution of 2-carboxybenzaldehyde (**1**, 150 mg, 1.0 mmol) in dry ethanol (10 mL) was added amine (1.0 mmol) and OSU-6 (7.5 mg, 5 wt%), followed by triethyl phosphite (166 mg, 1.0 mmol). The reaction mixture was stirred at 80 °C for a period of 2 h. The reaction mixture was cooled, and filtered (to separate the catalyst). The filtrate was concentrated along with silica gel and purified on a 2.5 cm x 10 cm silica gel column and eluted with increasing concentrations of EtOAc in hexanes to afford the pure products in yields shown in Table 1.

### ( $\pm$ )-Diethyl (2-benzyl-3-oxoisindolin-1-yl)phosphonate (**3a**):

Isolated as a pale yellow oil; IR: 1697, 1265  $\text{cm}^{-1}$ ;  $^1\text{H}$  NMR:  $\delta$  7.92 (d,  $J = 7.1$  Hz, 1H), 7.70 (d,  $J = 7.4$  Hz, 1H), 7.57 (t,  $J = 7.1$  Hz, 1H), 7.52 (t,  $J = 7.4$  Hz, 1H), 7.32-7.22 (complex, 5H), 5.57 (d,  $J = 14.9$  Hz, 1H), 4.68 (d,  $J = 13.4$  Hz, 1H), 4.60 (d,  $J = 14.9$  Hz, 1H), 4.12 (apparent quintet,  $J = 7.4$  Hz, 2H), 3.96 (m, 1H), 3.81 (m, 1H), 1.28 (t,  $J = 7.1$  Hz, 3H), 1.13 (t,  $J = 7.1$  Hz, 3H);  $^{13}\text{C}$  NMR:  $\delta$  168.9 (d,  $J = 4.0$  Hz), 138.8 (d,  $J = 5.1$  Hz), 136.8, 132.0 (d,  $J = 5.1$  Hz), 131.7 (d,  $J = 3.0$  Hz), 128.9 (d,  $J = 3.0$  Hz), 128.7, 128.4, 127.7, 124.5 (d,  $J = 3.0$  Hz), 124.0 (d,  $J = 1.0$  Hz), 63.5 (d,  $J = 7.1$  Hz), 63.3 (d,  $J = 7.1$  Hz), 56.4 (d,  $J = 155.5$  Hz), 45.1, 16.5 (d,  $J = 6.1$  Hz), 16.2 (d,  $J = 6.1$  Hz). HRMS (ESI) calcd for  $\text{C}_{19}\text{H}_{22}\text{NO}_4\text{P}$  [ $\text{M} + \text{H}$ ] $^+$ : 359.1286, found: 359.1289.

**(±)-Diethyl [2-(4-methylbenzyl)-3-oxoisindolin-1-yl]phosphonate (3b):**

Isolated as a light yellow oil; IR: 2840, 1699, 1247  $\text{cm}^{-1}$ ;  $^1\text{H}$  NMR:  $\delta$  7.91 (d,  $J = 7.1$  Hz, 1H), 7.69 (d,  $J = 7.3$  Hz, 1H), 7.56 (t,  $J = 7.0$  Hz, 1H), 7.51 (t,  $J = 7.4$  Hz, 1H), 7.24 (d,  $J = 8.4$  Hz, 2H), 6.83 (d,  $J = 8.4$  Hz, 2H), 5.51 (d,  $J = 14.7$  Hz, 1H), 4.66 (d,  $J = 13.3$  Hz, 1H), 4.52 (d,  $J = 14.7$  Hz, 1H), 4.12 (apparent quintet,  $J = 7.3$  Hz, 2H), 3.98 (m, 1H), 3.81 (m, 1H), 3.77 (s, 3H), 1.28 (t,  $J = 7.1$  Hz, 3H), 1.14 (t,  $J = 7.1$  Hz, 3H);  $^{13}\text{C}$  NMR:  $\delta$  168.8 (d,  $J = 3.0$  Hz), 159.2, 138.8 (d,  $J = 5.1$  Hz), 132.2 (d,  $J = 5.1$  Hz), 131.6 (d,  $J = 3.0$  Hz), 129.9, 129.0, 128.8 (d,  $J = 2.0$  Hz), 124.4 (d,  $J = 3.0$  Hz), 124.0 (d,  $J = 1.0$  Hz), 114.0, 63.4 (d,  $J = 7.1$  Hz), 63.3 (d,  $J = 7.1$  Hz), 56.2 (d,  $J = 155.5$  Hz), 55.3, 44.4, 16.5 (d,  $J = 6.1$  Hz), 16.3 (d,  $J = 5.1$  Hz). HRMS (ESI) calcd for  $\text{C}_{20}\text{H}_{24}\text{NO}_4\text{P}$   $[\text{M} + \text{H}]^+$ : 373.1443, found: 373.1449.

**(±)-Diethyl [3-oxo-2-(4-trifluoromethylbenzyl)isoindolin-1-yl]phosphonate (3c):**

Isolated as a light yellow oil; IR: 1699, 1325, 1258, 1125  $\text{cm}^{-1}$ ;  $^1\text{H}$  NMR:  $\delta$  7.93 (d,  $J = 7.3$  Hz, 1H), 7.71 (d,  $J = 7.5$  Hz, 1H), 7.63-7.51 (complex, 4H), 7.43 (d,  $J = 8.0$  Hz, 2H), 5.56 (d,  $J = 15.1$  Hz, 1H), 4.73 (d,  $J = 15.1$  Hz, 1H), 4.64 (d,  $J = 13.2$  Hz, 1H), 4.08 (apparent quintet,  $J = 7.2$  Hz, 2H), 4.00 (m, 1H), 3.87 (m, 1H), 1.24 (t,  $J = 7.1$  Hz, 3H), 1.16 (t,  $J = 7.1$  Hz, 3H);  $^{13}\text{C}$  NMR:  $\delta$  168.9 (d,  $J = 4.0$  Hz), 140.9 (d,  $J = 1.0$  Hz), 138.7 (d,  $J = 6.1$  Hz), 131.9 (d,  $J = 3.0$  Hz), 131.6 (d,  $J = 4.0$  Hz), 129.9 (q,  $J = 32.2$  Hz), 129.0 (d,  $J = 3.0$  Hz), 128.6, 125.7 (q,  $J = 4.0$  Hz), 124.4 (d,  $J = 2.0$  Hz), 124.1 (d,  $J = 2.0$  Hz), 124.0 (q,  $J = 272.7$  Hz), 63.5 (d,  $J = 7.1$  Hz), 63.4 (d,  $J = 8.1$  Hz), 56.6 (d,  $J = 156.6$  Hz), 44.7, 16.4 (d,  $J = 6.1$  Hz), 16.2 (d,  $J = 5.1$  Hz). HRMS (ESI) calcd for  $\text{C}_{20}\text{H}_{21}\text{F}_3\text{NO}_4\text{P}$   $[\text{M} + \text{H}]^+$ : 427.1160, found: 427.1168.

**(±)-Diethyl [2-(4-chlorobenzyl)-3-oxoisindolin-1-yl]phosphonate (3d):**

Isolated as a pale yellow oil; IR: 1699, 1258  $\text{cm}^{-1}$ ;  $^1\text{H}$  NMR:  $\delta$  7.92 (d,  $J = 7.3$  Hz, 1H), 7.70 (d,  $J = 7.5$  Hz, 1H), 7.58 (t,  $J = 7.3$  Hz, 1H), 7.53 (t,  $J = 7.4$  Hz, 1H), 7.28 (d,  $J = 8.8$  Hz, 2H), 7.25 (d,  $J = 8.8$  Hz, 2H), 5.50 (d,  $J = 14.9$  Hz, 1H), 4.62 (overlapping d,  $J = 14.4, 12.7$  Hz, 2H), 4.09 (apparent quintet,  $J = 7.3$  Hz, 2H), 4.00 (m, 1H), 3.87 (m, 1H), 1.25 (t,  $J = 7.1$  Hz, 3H), 1.16 (t,  $J = 7.1$  Hz, 3H);  $^{13}\text{C}$  NMR:  $\delta$  168.8 (d,  $J = 3.0$  Hz), 138.7 (d,  $J = 6.1$  Hz), 135.3, 133.6, 131.8 (2C,

overlapping d), 129.9, 129.0 (d,  $J = 2.0$  Hz), 128.9, 124.4 (d,  $J = 2.0$  Hz), 124.0 (d,  $J = 1.0$  Hz), 63.5 (d,  $J = 7.1$  Hz), 63.4 (d,  $J = 7.1$  Hz), 56.4 (d,  $J = 156.5$  Hz), 44.4, 16.5 (d,  $J = 6.1$  Hz), 16.3 (d,  $J = 6.1$  Hz). HRMS (ESI) calcd for  $C_{19}H_{21}ClNO_4P$  [ $M + H$ ] $^+$ : 393.0897, found: 393.0901.

**(±)-Diethyl [2-(4-fluorobenzyl)-3-oxoisindolin-1-yl]phosphonate (3e):**

Isolated as a light yellow oil;  $^1H$  NMR:  $\delta$  7.92 (d,  $J = 7.3$  Hz, 1H), 7.70 (d,  $J = 7.4$  Hz, 1H), 7.58 (t,  $J = 7.3$  Hz, 1H), 7.53 (t,  $J = 7.4$  Hz, 1H), 7.30 (dd,  $J = 8.4, 5.3$  Hz, 2H), 6.99 (t,  $J = 8.5$  Hz, 2H), 5.51 (d,  $J = 14.7$  Hz, 1H), 4.64 (d,  $J = 13.3$  Hz, 1H), 4.60 (d,  $J = 14.8$  Hz, 1H), 4.10 (apparent quintet,  $J = 7.3$  Hz, 2H), 3.99 (m, 1H), 3.87 (m, 1H), 1.26 (t,  $J = 7.1$ , 3H), 1.16 (t,  $J = 7.1$  Hz, 3H);  $^{13}C$  NMR:  $\delta$  168.8 (d,  $J = 3.0$  Hz), 162.3 (d,  $J = 247.5$  Hz), 138.7 (d,  $J = 6.1$  Hz), 132.6 (d,  $J = 3.0$  Hz), 131.9 (d,  $J = 4.0$  Hz), 131.8 (d,  $J = 3.0$  Hz), 130.2 (d,  $J = 8.1$  Hz), 128.9 (d,  $J = 2.0$  Hz), 124.5 (d,  $J = 2.0$  Hz), 124.1 (d,  $J = 2.0$  Hz), 115.6 (d,  $J = 22.2$  Hz), 63.4 (2C, overlapping d,  $J = 7.1, 8.1$  Hz), 56.4 (d,  $J = 156.6$  Hz), 44.3, 16.5 (d,  $J = 6.1$  Hz), 16.3 (d,  $J = 6.1$  Hz). HRMS (ESI) calcd for  $C_{19}H_{21}FNO_4P$  [ $M + H$ ] $^+$ : 377.1192, found: 377.1195.

**(±)-Diethyl [2-(3-methoxybenzyl)-3-oxoisindolin-1-yl]phosphonate (3f):**

Isolated as a pale yellow oil; IR: 2835, 1699, 1260  $cm^{-1}$ ;  $^1H$  NMR:  $\delta$  7.92 (d,  $J = 7.2$  Hz, 1H), 7.71 (d,  $J = 7.3$  Hz, 1H), 7.57 (t,  $J = 7.1$  Hz, 1H), 7.52 (t,  $J = 7.4$  Hz, 1H), 7.22 (t,  $J = 7.9$  Hz, 1H), 6.89 (d,  $J = 7.6$  Hz, 1H), 6.84 (s, 1H), 6.80 (dd,  $J = 8.2, 2.5$  Hz, 1H), 5.54 (d,  $J = 14.8$  Hz, 1H), 4.70 (d,  $J = 13.3$  Hz, 1H), 4.56 (d,  $J = 14.8$  Hz, 1H), 4.12 (apparent quintet,  $J = 7.2$  Hz, 2H), 3.97 (m, 1H), 3.81 (m, 1H), 3.76 (s, 3H), 1.29 (t,  $J = 7.1$  Hz, 3H), 1.12 (t,  $J = 7.1$  Hz, 3H);  $^{13}C$  NMR:  $\delta$  168.8 (d,  $J = 3.0$  Hz), 159.9, 138.8 (d,  $J = 6.1$  Hz), 138.3, 132.0 (d,  $J = 4.0$  Hz), 131.7 (d,  $J = 2.0$  Hz), 129.8, 128.9 (d,  $J = 3.0$  Hz), 124.5 (d,  $J = 3.0$  Hz), 124.0 (d,  $J = 2.0$  Hz), 120.6, 113.9, 113.1 63.4 (d,  $J = 7.1$  Hz), 63.3 (d,  $J = 8.1$  Hz), 56.4 (d,  $J = 155.5$  Hz), 55.2, 45.0, 16.5 (d,  $J = 6.1$  Hz), 16.2 (d,  $J = 5.1$  Hz). HRMS (ESI) calcd for  $C_{20}H_{24}NO_5P$  [ $M + H$ ] $^+$ : 389.1392, found: 389.1396.

**(±)-Diethyl [2-(4-methoxybenzyl)-3-oxoisindolin-1-yl]phosphonate (3g):**

Isolated as a light yellow oil; IR: 2839, 1699, 1247  $\text{cm}^{-1}$ ;  $^1\text{H}$  NMR:  $\delta$  7.91 (d,  $J = 7.1$  Hz, 1H), 7.69 (d,  $J = 7.3$  Hz, 1H), 7.56 (t,  $J = 7.0$  Hz, 1H), 7.51 (t,  $J = 7.4$  Hz, 1H), 7.24 (d,  $J = 8.4$  Hz, 2H), 6.83 (d,  $J = 8.4$  Hz, 2H), 5.51 (d,  $J = 14.7$  Hz, 1H), 4.66 (d,  $J = 13.3$  Hz, 1H), 4.52 (d,  $J = 14.7$  Hz, 1H), 4.12 (apparent quintet,  $J = 7.3$  Hz, 2H), 3.98 (m, 1H), 3.81 (m, 1H), 3.77 (s, 3H), 1.28 (t,  $J = 7.1$  Hz, 3H), 1.14 (t,  $J = 7.1$  Hz, 3H);  $^{13}\text{C}$  NMR:  $\delta$  168.8 (d,  $J = 3.0$  Hz), 159.2, 138.8 (d,  $J = 5.1$  Hz), 132.2 (d,  $J = 5.1$  Hz), 131.6 (d,  $J = 3.0$  Hz), 129.9, 129.0, 128.8 (d,  $J = 2.0$  Hz), 124.4 (d,  $J = 3.0$  Hz), 124.0 (d,  $J = 1.0$  Hz), 114.0, 63.4 (d,  $J = 7.1$  Hz), 63.3 (d,  $J = 7.1$  Hz), 56.2 (d,  $J = 155.5$  Hz), 55.3, 44.4, 16.5 (d,  $J = 6.1$  Hz), 16.3 (d,  $J = 5.1$  Hz). HRMS (ESI) calcd for  $\text{C}_{20}\text{H}_{24}\text{NO}_5\text{P}$  [ $\text{M} + \text{H}$ ] $^+$ : 389.1392, found: 389.1390.

**(±)-Diethyl (3-oxo-2-phenylisoindolin-1-yl)phosphonate (3h):**

Isolated as white solid, mp 129-131  $^{\circ}\text{C}$ ; IR: 1699, 1261  $\text{cm}^{-1}$ ;  $^1\text{H}$  NMR:  $\delta$  7.96 (d,  $J = 7.5$  Hz, 1H), 7.89 (d,  $J = 7.6$  Hz, 1H), 7.65 (t,  $J = 7.5$  Hz, 1H), 7.57 (d,  $J = 7.5$  Hz, 1H), 7.51 (d,  $J = 7.9$  Hz, 2H), 7.44 (t,  $J = 7.8$  Hz, 2H), 7.29 (t,  $J = 7.3$  Hz, 1H), 5.57 (d,  $J = 12.7$  Hz, 1H), 3.82 (m, 3H), 3.46 (m, 1H), 0.93 (apparent quartet,  $J = 7.4$  Hz, 6H);  $^{13}\text{C}$  NMR:  $\delta$  167.5 (d,  $J = 3.0$  Hz), 138.1 (d,  $J = 6.1$  Hz), 133.4, 132.2 (d,  $J = 3.0$  Hz), 132.1 (d,  $J = 4.0$  Hz), 129.2 (d,  $J = 3.0$  Hz), 129.8, 126.4, 125.2, 124.6 (d,  $J = 2.0$  Hz), 124.4 (d,  $J = 2.0$  Hz), 63.8 (d,  $J = 7.1$  Hz), 62.6 (d,  $J = 7.1$  Hz), 59.2 (d,  $J = 154.5$  Hz), 16.1 (d,  $J = 16.1$  Hz), 15.8 (d,  $J = 7.1$  Hz). HRMS (ESI) calcd for  $\text{C}_{18}\text{H}_{20}\text{NO}_4\text{P}$  [ $\text{M} + \text{H}$ ] $^+$ : 345.1130, found: 345.1127.

**(±)-Diethyl [2-(2-methylphenyl)-3-oxoisoindolin-1-yl]phosphonate (3i):**

Isolated as white solid, mp 125-127  $^{\circ}\text{C}$ ; IR: 1703, 1253  $\text{cm}^{-1}$ ;  $^1\text{H}$  NMR:  $\delta$  7.95 (d,  $J = 7.5$  Hz, 1H), 7.88 (d,  $J = 7.6$  Hz, 1H), 7.64 (t,  $J = 7.5$  Hz, 1H), 7.57 (t,  $J = 7.5$  Hz, 1H), 7.30 (m, 3H), 7.10 (d,  $J = 7.4$  Hz, 1H), 5.54 (d,  $J = 12.8$  Hz, 1H), 3.82 (overlapping m, 3H), 3.46 (m, 1H), 2.40 (s, 3H), 0.96 (t,  $J = 7.1$  Hz, 3H), 0.92 (t,  $J = 7.1$  Hz, 3H);  $^{13}\text{C}$  NMR:  $\delta$  167.3 (d,  $J = 2.0$  Hz), 138.6, 138.1 (d,  $J = 6.1$  Hz), 137.3, 132.2 (d,  $J = 4.0$  Hz), 132.1 (d,  $J = 3.0$  Hz), 129.1 (d,  $J = 2.0$  Hz), 128.6, 127.2, 125.9, 124.6 (d,  $J = 2.0$  Hz), 124.3 (d,  $J = 1.0$  Hz), 122.3, 63.7 (d,  $J = 7.1$  Hz), 62.5 (d,  $J = 7.1$  Hz), 59.3 (d,  $J = 154.5$  Hz), 21.5, 16.1 (d,  $J = 5.1$  Hz), 15.8 (d,  $J = 7.1$  Hz). HRMS (ESI) calcd for  $\text{C}_{19}\text{H}_{22}\text{NO}_4\text{P}$  [ $\text{M} + \text{H}$ ] $^+$ : 359.1286, found: 359.1293.

**(±)-Diethyl [2-(4-methylphenyl)-3-oxoisindolin-1-yl]phosphonate (3j):**

Isolated as white solid, mp 115-117 °C; IR: 1700, 1261  $\text{cm}^{-1}$ ;  $^1\text{H}$  NMR:  $\delta$  7.95 (d,  $J = 7.5$  Hz, 1H), 7.87 (d,  $J = 7.6$  Hz, 1H), 7.64 (t,  $J = 7.5$  Hz, 1H), 7.56 (t,  $J = 7.5$  Hz, 1H), 7.37 (d,  $J = 8.2$  Hz, 2H), 7.24 (d,  $J = 8.1$  Hz, 2H), 5.51 (d,  $J = 12.8$  Hz, 1H), 3.82 (overlapping m, 3H), 3.50 (m, 1H), 2.38 (s, 3H), 0.95 (apparent quartet,  $J = 7.4$  Hz, 6H);  $^{13}\text{C}$  NMR:  $\delta$  167.6 (d,  $J = 2.0$  Hz), 138.1 (d,  $J = 5.1$  Hz), 136.3, 134.8, 132.2 (d,  $J = 5.1$  Hz), 132.0 (d,  $J = 3.0$  Hz), 129.4, 129.1 (d,  $J = 3.0$  Hz), 125.2, 124.6 (d,  $J = 2.0$  Hz), 124.3 (d,  $J = 1.0$  Hz), 63.7 (d,  $J = 7.1$  Hz), 62.6 (d,  $J = 8.1$  Hz), 59.4 (d,  $J = 153.5$  Hz), 21.1, 16.1 (d,  $J = 5.1$  Hz), 15.8 (d,  $J = 7.1$  Hz). HRMS (ESI) calcd for  $\text{C}_{19}\text{H}_{22}\text{NO}_4\text{P}$  [ $\text{M} + \text{H}$ ] $^+$ : 359.1286, found: 359.1288.

**(±)-Diethyl [2-(4-chlorophenyl)-3-oxoisindolin-1-yl]phosphonate (3k):**

Isolated as white solid, mp 160-162 °C; IR: 1703, 1261  $\text{cm}^{-1}$ ;  $^1\text{H}$  NMR:  $\delta$  7.96 (d,  $J = 7.5$  Hz, 1H), 7.88 (d,  $J = 7.7$  Hz, 1H), 7.67 (t,  $J = 7.5$  Hz, 1H), 7.58 (t,  $J = 7.5$  Hz, 1H), 7.48 (d,  $J = 8.6$  Hz, 2H), 7.42 (d,  $J = 8.6$  Hz, 2H), 5.52 (d,  $J = 12.4$  Hz, 1H), 3.84 (overlapping m, 3H), 3.51 (m, 1H), 1.00 (t,  $J = 7.1$  Hz, 3H), 0.95 (t,  $J = 7.1$  Hz, 3H);  $^{13}\text{C}$  NMR:  $\delta$  167.6 (d,  $J = 3.0$  Hz), 138.1 (d,  $J = 6.1$  Hz), 136.3, 134.8, 132.2 (d,  $J = 4.0$  Hz), 132.0 (d,  $J = 3.0$  Hz), 129.4, 129.1 (d,  $J = 3.0$  Hz), 125.2, 124.6 (d,  $J = 2.0$  Hz), 124.3 (d,  $J = 2.0$  Hz), 63.7 (d,  $J = 7.1$  Hz), 62.6 (d,  $J = 7.1$  Hz), 59.4 (d,  $J = 153.5$  Hz), 16.1 (d,  $J = 5.1$  Hz), 15.8 (d,  $J = 7.1$  Hz). HRMS (ESI) calcd for  $\text{C}_{18}\text{H}_{19}\text{ClNO}_4\text{P}$  [ $\text{M} + \text{H}$ ] $^+$ : 379.0740, found: 379.0749.

**(±)-Diethyl [2-(2-fluorophenyl)-3-oxoisindolin-1-yl]phosphonate (3l):**

Isolated as white solid, mp 132-134 °C; IR: 1712, 1258  $\text{cm}^{-1}$ ;  $^1\text{H}$  NMR:  $\delta$  7.97 (d,  $J = 7.6$  Hz, 1H), 7.90 (d,  $J = 7.6$  Hz, 1H), 7.67 (t,  $J = 7.5$  Hz, 1H), 7.58 (t,  $J = 7.5$  Hz, obscures a second signal, 2H), 7.32 (m, 1H), 7.26 (m, 1H), 7.19 (m, 1H), 5.60 (d,  $J = 12.9$  Hz, 1H), 3.84 (overlapping m, 3H), 3.52 (m, 1H), 0.96 (t,  $J = 7.1$  Hz, 3H), 0.93 (t,  $J = 7.1$  Hz, 3H);  $^{13}\text{C}$  NMR:  $\delta$  167.7 (d,  $J = 2.0$  Hz), 157.7 (d,  $J = 251.5$  Hz), 138.6 (d,  $J = 6.1$  Hz), 132.4 (d,  $J = 2.0$  Hz), 131.2 (d,  $J = 5.1$  Hz), 129.8 129.0 (d,  $J = 3.0$  Hz), 128.8 (d,  $J = 8.1$  Hz), 125.0 (d,  $J = 11.1$  Hz), 124.7

(d,  $J = 2.0$  Hz), 124.4 (d,  $J = 1.0$  Hz), 124.3 (d,  $J = 3.0$  Hz), 116.2 (d,  $J = 20.2$  Hz), 63.7 (d,  $J = 7.1$  Hz), 62.5 (d,  $J = 7.1$  Hz), 59.0 (dd,  $J = 152.5, 5.1$  Hz), 16.1 (d,  $J = 5.1$  Hz), 15.8 (d,  $J = 7.1$  Hz). HRMS (ESI) calcd for  $C_{18}H_{19}FNO_4P$   $[M + H]^+$ : 363.1036, found: 363.1041.

**(±)-Diethyl [2-(4-fluorophenyl)-3-oxoisindolin-1-yl]phosphonate (3m):**

Isolated as white solid, mp 123-125 °C; IR: 1703, 1259  $cm^{-1}$ ;  $^1H$  NMR:  $\delta$  7.96 (d,  $J = 7.5$  Hz, 1H), 7.88 (d,  $J = 7.7$  Hz, 1H), 7.66 (t,  $J = 7.5$  Hz, 1H), 7.58 (d,  $J = 7.5$  Hz, 1H), 7.47 (dd,  $J = 8.8, 4.8$  Hz, 2H), 7.14 (t,  $J = 8.6$  Hz, 2H), 5.49 (d,  $J = 12.6$  Hz, 1H), 3.85 (overlapping m, 3H), 3.50 (m, 1H), 1.00 (t,  $J = 7.1$  Hz, 3H), 0.95 (t,  $J = 7.1$  Hz, 3H);  $^{13}C$  NMR:  $\delta$  167.6 (d,  $J = 2.0$  Hz), 160.9 (d,  $J = 247.5$  Hz), 137.9 (d,  $J = 5.1$  Hz), 133.5 (d,  $J = 3.0$  Hz), 132.3 (d,  $J = 2.0$  Hz), 131.8 (d,  $J = 4.0$  Hz), 129.3 (d,  $J = 2.0$  Hz), 127.1 (d,  $J = 8.1$  Hz), 124.6 (d,  $J = 3.0$  Hz), 124.4 (d,  $J = 1.0$  Hz), 115.6 (d,  $J = 23.2$  Hz), 63.5 (d,  $J = 7.1$  Hz), 62.6 (d,  $J = 7.1$  Hz), 59.4 (d,  $J = 154.5$  Hz), 16.1 (d,  $J = 5.1$  Hz), 15.9 (d,  $J = 6.1$  Hz). HRMS (ESI) calcd for  $C_{18}H_{19}FNO_4P$   $[M + H]^+$ : 363.1036, found: 363.1047.

**(±)-Diethyl [2-(3-methoxyphenyl)-3-oxoisindolin-1-yl]phosphonate (3n):**

Isolated as white solid, mp 110-112 °C; IR: 2836, 1703, 1258  $cm^{-1}$ ;  $^1H$  NMR:  $\delta$  7.95 (d,  $J = 7.5$  Hz, 1H), 7.88 (d,  $J = 7.6$  Hz, 1H), 7.65 (d,  $J = 7.5$  Hz, 1H), 7.57 (t,  $J = 7.5$  Hz, 1H), 7.34 (t,  $J = 8.1$  Hz, 1H), 7.14 (t,  $J = 2.4$  Hz, 1H), 7.07 (d,  $J = 8.1$  Hz, 1H), 6.84 (dd,  $J = 8.1, 2.4$  Hz, 1H), 5.54 (d,  $J = 12.6$  Hz, 1H), 3.86 (m, 2H), 3.84 (s, 3H), 3.80 (m, 1H), 3.48 (m, 1H), 0.99 (t,  $J = 7.1$  Hz, 3H), 0.93 (t,  $J = 7.1$  Hz, 3H);  $^{13}C$  NMR:  $\delta$  167.5 (d,  $J = 2.0$  Hz), 159.9, 138.5, 138.1 (d,  $J = 6.1$  Hz), 132.2 (d,  $J = 2.0$  Hz), 132.1 (d,  $J = 4.0$  Hz), 129.4, 129.2 (d,  $J = 2.0$  Hz), 124.6 (d,  $J = 3.0$  Hz), 124.3 (d,  $J = 2.0$  Hz), 117.2, 112.2, 111.1, 63.8 (d,  $J = 7.1$  Hz), 62.6 (d,  $J = 7.1$  Hz), 59.3 (d,  $J = 153.5$  Hz), 55.4, 16.1 (d,  $J = 5.1$  Hz), 15.8 (d,  $J = 7.1$  Hz). HRMS (ESI) calcd for  $C_{19}H_{22}NO_5P$   $[M + H]^+$ : 375.1236, found: 375.1243.

**(±)-Diethyl [2-(4-methoxyphenyl)-3-oxoisindolin-1-yl]phosphonate (3o):**



Isolated as white solid, mp 149-151 °C; IR: 2839, 1699, 1248 cm<sup>-1</sup>; <sup>1</sup>H NMR: δ 7.95 (d, *J* = 7.5 Hz, 1H), 7.87 (d, *J* = 7.6 Hz, 1H), 7.64 (t, *J* = 7.5 Hz, 1H), 7.56 (t, *J* = 7.5 Hz, 1H), 7.39 (d, *J* = 8.8 Hz, 2H), 6.98 (d, *J* = 8.8 Hz, 2H), 5.46 (d, *J* = 12.9 Hz, 1H), 3.84 (overlapping m, 3H), 3.82 (s, 3H), 3.51 (m, 1H), 1.00 (t, *J* = 7.1 Hz, 3H), 0.95 (t, *J* = 7.1 Hz, 3H); <sup>13</sup>C NMR: δ 167.8 (d, *J* = 3.0 Hz), 158.2, 138.1 (d, *J* = 6.1 Hz), 132.1 (d, *J* = 5.1 Hz), 132.0 (d, *J* = 2.0 Hz), 130.3, 129.1 (d, *J* = 3.0 Hz), 126.9, 124.6 (d, *J* = 3.0 Hz), 124.3 (d, *J* = 1.0 Hz), 114.1, 63.7 (d, *J* = 7.1 Hz), 62.6 (d, *J* = 7.1 Hz), 59.7 (d, *J* = 153.5 Hz), 55.6, 16.1 (d, *J* = 5.1 Hz), 15.9 (d, *J* = 7.1 Hz). HRMS (ESI) calcd for C<sub>19</sub>H<sub>22</sub>NO<sub>5</sub>P [M + H]<sup>+</sup>: 375.1236, found: 375.1245.

**(±)-Diethyl [3-oxo-2-(4-trifluoromethoxyphenyl)isoindolin-1-yl]phosphonate (3p):**

Isolated as white solid, mp 132-134 °C; IR: 1688, 1305, 1253 cm<sup>-1</sup>; <sup>1</sup>H NMR: δ 7.97 (d, *J* = 7.6 Hz, 1H), 7.89 (d, *J* = 7.6 Hz, 1H), 7.67 (t, *J* = 7.5 Hz, 1H), 7.59 (d, *J* = 7.5 Hz, 1H), 7.56 (d, *J* = 9.0 Hz, 2H), 7.31 (d, *J* = 9.0 Hz, 2H), 5.54 (d, *J* = 12.3 Hz, 1H), 3.85 (overlapping m, 3H), 3.48 (m, 1H), 0.96 (t, *J* = 7.1 Hz, 3H), 0.93 (t, *J* = 7.1 Hz, 3H); <sup>13</sup>C NMR: δ 167.5 (d, *J* = 2.0 Hz), 147.0, 137.9 (d, *J* = 6.1 Hz), 136.1, 132.4 (d, *J* = 3.0 Hz), 131.7 (d, *J* = 4.0 Hz), 129.3 (d, *J* = 3.0 Hz), 126.4, 124.7 (d, *J* = 3.0 Hz), 124.5 (d, *J* = 1.0 Hz), 121.5, 120.5 (q, *J* = 257.6 Hz), 64.0 (d, *J* = 7.1 Hz), 62.6 (d, *J* = 8.1 Hz), 59.1 (d, *J* = 153.5 Hz), 16.0 (d, *J* = 5.1 Hz), 15.7 (d, *J* = 7.1 Hz). HRMS (ESI) calcd for C<sub>19</sub>H<sub>19</sub>F<sub>3</sub>NO<sub>5</sub>P [M + H]<sup>+</sup>: 429.0953, found: 429.0970.

**(±)-Diethyl [3-oxo-2-(2-phenethyl)isoindolin-1-yl]phosphonate (3q):**

Isolated as a yellow oil; IR: 1694, 1258 cm<sup>-1</sup>; <sup>1</sup>H NMR: δ 7.87 (d, *J* = 7.3 Hz, 1H), 7.71 (d, *J* = 7.4 Hz, 1H), 7.56 (t, *J* = 7.3 Hz, 1H), 7.51 (t, *J* = 7.3 Hz, 1H), 7.29-7.16 (complex, 5H), 4.62 (d, *J* = 13.3 Hz, 1H), 4.36 (ddd, *J* = 14.3, 9.1, 5.6 Hz, 1H), 4.10 (apparent quintet, *J* = 7.5 Hz, 2H), 3.94 (m, 1H), 3.82 (m, 2H), 3.10 (ddd, *J* = 16.0, 8.6, 7.1 Hz, 1H), 2.93 (ddd, *J* = 13.9, 8.6, 5.6 Hz, 1H), 1.26 (t, *J* = 7.1 Hz, 3H), 1.11 (t, *J* = 7.1 Hz, 3H); <sup>13</sup>C NMR: δ 168.7 (d, *J* = 3.0 Hz), 138.7, 138.5 (d, *J* = 6.1 Hz), 132.3 (d, *J* = 4.0 Hz), 131.5 (d, *J* = 3.0 Hz), 128.8 (d, *J* = 2.0 Hz), 128.8, 128.6, 126.5, 124.4 (d, *J* = 2.0 Hz), 123.7 (d, *J* = 1.0 Hz), 63.5 (d, *J* = 7.1 Hz), 63.2 (d, *J* = 7.1 Hz), 57.8 (d, *J* = 155.5 Hz), 43.4, 34.3, 16.5 (d, *J* = 6.1 Hz), 16.2 (d, *J* = 5.1 Hz). HRMS (ESI) calcd for C<sub>20</sub>H<sub>24</sub>NO<sub>4</sub>P [M + H]<sup>+</sup>: 373.1443, found: 373.1451.

**(±)-Diethyl {3-oxo-[2-(5,6,7,8-tetrahydronaphthalen-1-yl)]isoindolin-1-yl}phosphonate (3r):**

Isolated as white solid, mp 136-138 °C; IR: 1699, 1251  $\text{cm}^{-1}$ ;  $^1\text{H}$  NMR:  $\delta$  7.94 (d,  $J = 7.5$  Hz, 1H), 7.87 (d,  $J = 7.6$  Hz, 1H), 7.63 (d,  $J = 7.5$  Hz, 1H), 7.55 (d,  $J = 7.5$  Hz, 1H), 7.19 (m, 2H), 7.11 (d,  $J = 8.0$  Hz, 1H), 5.50 (d,  $J = 12.8$  Hz, 1H), 3.87 (apparent quintet,  $J = 7.1$  Hz, 2H), 3.83 (m, 1H), 3.50 (m, 1H), 2.78 (m, 4H), 1.80 (m, 4H), 0.97 (t,  $J = 7.1$  Hz, 3H), 0.94 (t,  $J = 7.1$  Hz, 3H);  $^{13}\text{C}$  NMR:  $\delta$  167.6 (d,  $J = 3.0$  Hz), 138.1 (d,  $J = 6.1$  Hz), 137.5, 135.7, 134.6, 132.2 (d,  $J = 4.0$  Hz), 131.9 (d,  $J = 2.0$  Hz), 129.4, 129.0 (d,  $J = 2.0$  Hz), 125.8, 124.6 (d,  $J = 3.0$  Hz), 124.2, 122.6, 63.7 (d,  $J = 7.1$  Hz), 62.6 (d,  $J = 6.1$  Hz), 59.5 (d,  $J = 155.5$  Hz), 29.5, 29.1, 23.2, 23.1, 16.0 (d,  $J = 5.1$  Hz), 15.7 (d,  $J = 7.1$  Hz). HRMS (ESI) calcd for  $\text{C}_{22}\text{H}_{26}\text{NO}_4\text{P}$   $[\text{M} + \text{H}]^+$ : 399.1599, found: 399.1612.

**(±)-Diethyl (2-isobutyl-3-oxoisoindolin-1-yl)phosphonate (3s):**

Isolated as a light yellow oil; IR: 1694, 1259  $\text{cm}^{-1}$ ;  $^1\text{H}$  NMR:  $\delta$  7.88 (d,  $J = 7.4$  Hz, 1H), 7.79 (d,  $J = 7.4$  Hz, 1H), 7.58 (t,  $J = 7.3$  Hz, 1H), 7.52 (t,  $J = 7.3$  Hz, 1H), 4.89 (d,  $J = 13.8$  Hz, 1H), 4.12 (quintet of d,  $J = 7.3$  Hz, 2H), 3.95 (m, 2H), 3.80 (m, 1H), 3.45 (dd,  $J = 13.8, 5.2$  Hz, 1H), 2.12 (m, 1H), 1.27 (t,  $J = 7.1$  Hz, 3H), 1.11 (t,  $J = 7.1$  Hz, 3H), 1.00 (d,  $J = 6.7$  Hz, 3H), 0.82 (d,  $J = 6.7$  Hz, 3H);  $^{13}\text{C}$  NMR:  $\delta$  168.9 (d,  $J = 3.0$  Hz), 138.4 (d,  $J = 6.1$  Hz), 132.3 (d,  $J = 4.0$  Hz), 131.4 (d,  $J = 2.0$  Hz), 128.8 (d,  $J = 2.0$  Hz), 124.5 (d,  $J = 3.0$  Hz), 123.8 (d,  $J = 1.0$  Hz), 63.4 (d,  $J = 7.1$  Hz), 63.1 (d,  $J = 7.1$  Hz), 57.3 (d,  $J = 155.5$  Hz), 48.7, 27.1, 20.3, 19.5, 16.4 (d,  $J = 6.1$  Hz), 16.2 (d,  $J = 5.1$  Hz). HRMS (ESI) calcd for  $\text{C}_{16}\text{H}_{24}\text{NO}_4\text{P}$   $[\text{M} + \text{H}]^+$ : 325.1443, found: 325.1440.

**(±)-Diethyl (2-hexyl-3-oxoisoindolin-1-yl)phosphonate (3t):**

Isolated as a light yellow oil; IR: 1697, 1260  $\text{cm}^{-1}$ ;  $^1\text{H}$  NMR:  $\delta$  7.80 (d,  $J = 7.4$  Hz, 1H), 7.71 (d,  $J = 7.5$  Hz, 1H), 7.50 (t,  $J = 7.4$  Hz, 1H), 7.44 (t,  $J = 7.4$  Hz, 1H), 4.81 (d,  $J = 13.6$  Hz, 1H), 4.05 (m, 2H), 3.88 (m, 1H), 3.73 (m, 1H), 3.48 (ddd,  $J = 13.8, 9.0, 4.8$  Hz, 1H), 1.64 (m, 1H), 1.53 (m, 1H), 1.24 (m, 7H), 1.19 (t,  $J = 7.1$  Hz, 3H), 1.04 (t,  $J = 7.1$  Hz, 3H), 0.80 (distorted t,  $J = 6.7$

Hz, 3H);  $^{13}\text{C}$  NMR:  $\delta$  167.6 (d,  $J = 3.0$  Hz), 137.5 (d,  $J = 6.1$  Hz), 131.5 (d,  $J = 5.1$  Hz), 130.4 (d,  $J = 3.0$  Hz), 127.8 (d,  $J = 2.0$  Hz), 123.4 (d,  $J = 3.0$  Hz), 122.7 (d,  $J = 2.0$  Hz), 62.4 (d,  $J = 7.1$  Hz), 62.1 (d,  $J = 7.1$  Hz), 56.1 (d,  $J = 155.5$  Hz), 40.8, 30.5, 26.9, 25.5, 21.5, 15.4 (d,  $J = 6.1$  Hz), 15.2 (d,  $J = 5.1$  Hz), 13.0. HRMS (ESI) calcd for  $\text{C}_{18}\text{H}_{28}\text{NO}_4\text{P}$  [ $\text{M} + \text{H}$ ] $^+$ : 353.1756, found: 353.1762.

**(±)-Diethyl (2-allyl-3-oxoisindolin-1-yl)phosphonate (3u):**

Isolated as a light yellow oil; IR: 1698, 1642, 1257  $\text{cm}^{-1}$ ;  $^1\text{H}$  NMR:  $\delta$  7.89 (d,  $J = 7.5$  Hz, 1H), 7.78 (d,  $J = 7.7$  Hz, 1H), 7.59 (t,  $J = 7.4$  Hz, 1H), 7.52 (t,  $J = 7.4$  Hz, 1H), 5.80 (m, 1H), 5.23 (d,  $J = 16.6$  Hz, 1H), 5.22 (d,  $J = 10.7$  Hz, 1H), 4.90 (d,  $J = 13.5$  Hz, 1H), 4.86 (dd,  $J = 16.0, 4.4$  Hz, 1H), 4.12 (m, 3H), 3.98 (m, 1H), 3.81 (m, 1H), 1.27 (t,  $J = 7.1$  Hz, 3H), 1.12 (t,  $J = 7.1$  Hz, 3H);  $^{13}\text{C}$  NMR:  $\delta$  168.9 (d,  $J = 3.0$  Hz), 138.7 (d,  $J = 6.1$  Hz), 132.5, 132.2 (d,  $J = 4.0$  Hz), 131.7 (d,  $J = 2.0$  Hz), 128.9 (d,  $J = 3.0$  Hz), 124.5 (d,  $J = 2.0$  Hz), 123.9 (d,  $J = 1.0$  Hz), 118.4, 63.5 (d,  $J = 7.1$  Hz), 63.2 (d,  $J = 7.1$  Hz), 56.7 (d,  $J = 156.6$  Hz), 44.0, 16.4 (d,  $J = 6.1$  Hz), 16.2 (d,  $J = 6.1$  Hz). HRMS (ESI) calcd for  $\text{C}_{15}\text{H}_{20}\text{NO}_4\text{P}$  [ $\text{M} + \text{H}$ ] $^+$ : 309.1130, found: 309.1136.

**(±)-Diethyl (2-cyclopropyl-3-oxoisindolin-1-yl)phosphonate (3v):**

Isolated as a light yellow oil; IR: 1699, 1260  $\text{cm}^{-1}$ ;  $^1\text{H}$  NMR:  $\delta$  7.83 (d,  $J = 7.5$  Hz, 1H), 7.74 (d,  $J = 7.6$  Hz, 1H), 7.57 (t,  $J = 7.4$  Hz, 1H), 7.50 (t,  $J = 7.4$  Hz, 1H), 4.77 (d,  $J = 13.2$  Hz, 1H), 4.20 (apparent quintet of d,  $J = 7.2, 2.9$  Hz, 2H), 3.93 (m, 1H), 3.73 (m, 1H), 2.92 (tt,  $J = 7.2, 3.9$  Hz, 1H), 1.33 (t,  $J = 7.1$  Hz, 3H), 1.17 (m, 1H), 1.07 (t,  $J = 7.1$  Hz, 3H), 1.05 (m, 1H), 0.84 (m, 1H), 0.67 (m, 1H);  $^{13}\text{C}$  NMR:  $\delta$  169.1 (d,  $J = 2.0$  Hz), 138.3 (d,  $J = 6.1$  Hz), 132.6 (d,  $J = 4.0$  Hz), 131.6 (d,  $J = 3.0$  Hz), 128.8 (d,  $J = 3.0$  Hz), 124.4 (d,  $J = 2.0$  Hz), 123.6 (d,  $J = 2.0$  Hz), 63.5 (d,  $J = 7.1$  Hz), 62.9 (d,  $J = 8.1$  Hz), 58.9 (d,  $J = 153.5$  Hz), 25.3 16.4 (d,  $J = 6.1$  Hz), 16.2 (d,  $J = 5.1$  Hz), 8.7, 6.2. HRMS (ESI) calcd for  $\text{C}_{15}\text{H}_{20}\text{NO}_4\text{P}$  [ $\text{M} + \text{H}$ ] $^+$ : 309.1130, found: 309.1133.

**(±)-Diethyl (2-cyclohexyl-3-oxoisindolin-1-yl)phosphonate (3w):**

Isolated as a light yellow oil; IR: 1689, 1257  $\text{cm}^{-1}$ ;  $^1\text{H}$  NMR:  $\delta$  7.82 (d,  $J = 7.5$  Hz, 1H), 7.74 (d,  $J = 7.5$  Hz, 1H), 7.55 (t,  $J = 7.4$  Hz, 1H), 7.49 (t,  $J = 7.4$  Hz, 1H), 4.85 (d,  $J = 13.1$  Hz, 1H), 4.10 (m, 2H), 3.97 (m, 1H), 3.79 (m, 2H), 2.45 (qd,  $J = 12.5, 4.2$  Hz, 1H), 2.23 (qd,  $J = 12.3, 3.7$  Hz, 1H), 1.95-1.63 (complex, 5H), 1.40-1.24 (m, 3H), 1.24 (t,  $J = 7.1$  Hz, 3H), 1.15 (t,  $J = 7.1$  Hz, 3H);  $^{13}\text{C}$  NMR:  $\delta$  169.0 (d,  $J = 4.0$  Hz), 138.8 (d,  $J = 6.1$  Hz), 133.6 (d,  $J = 4.0$  Hz), 131.2 (d,  $J = 2.0$  Hz), 128.7 (d,  $J = 2.0$  Hz), 124.4 (d,  $J = 3.0$  Hz), 123.4 (d,  $J = 1.0$  Hz), 63.4 (d,  $J = 7.1$  Hz), 63.2 (d,  $J = 7.1$  Hz), 58.6 (d,  $J = 156.6$  Hz), 56.7, 29.7, 29.4, 26.4, 26.1, 25.3, 16.3 (2C, overlapping d,  $J = 6.1, 5.1$  Hz). HRMS (ESI) calcd for  $\text{C}_{18}\text{H}_{26}\text{NO}_4\text{P}$   $[\text{M} + \text{H}]^+$ : 351.1599, found: 351.1604.

### **Procedure to regenerate OSU-6:**

The catalyst recovered from the reaction was washed with ethanol:water (1:1,  $3 \times 15$  mL) and air-dried. The catalyst was placed in a round-bottomed flask, heated to 200  $^\circ\text{C}$  and dried under high vacuum overnight (14 h). Once cooled, the catalyst was ready for reuse.

# (±)-Diethyl (2-benzyl-3-oxoisindolin-1-yl)phosphonate (3a):

NP-1H-Benzylphosphonate-11-14-14.10.fid  
PROTON CDCl3 (C:\NMRDATA) muddala 5

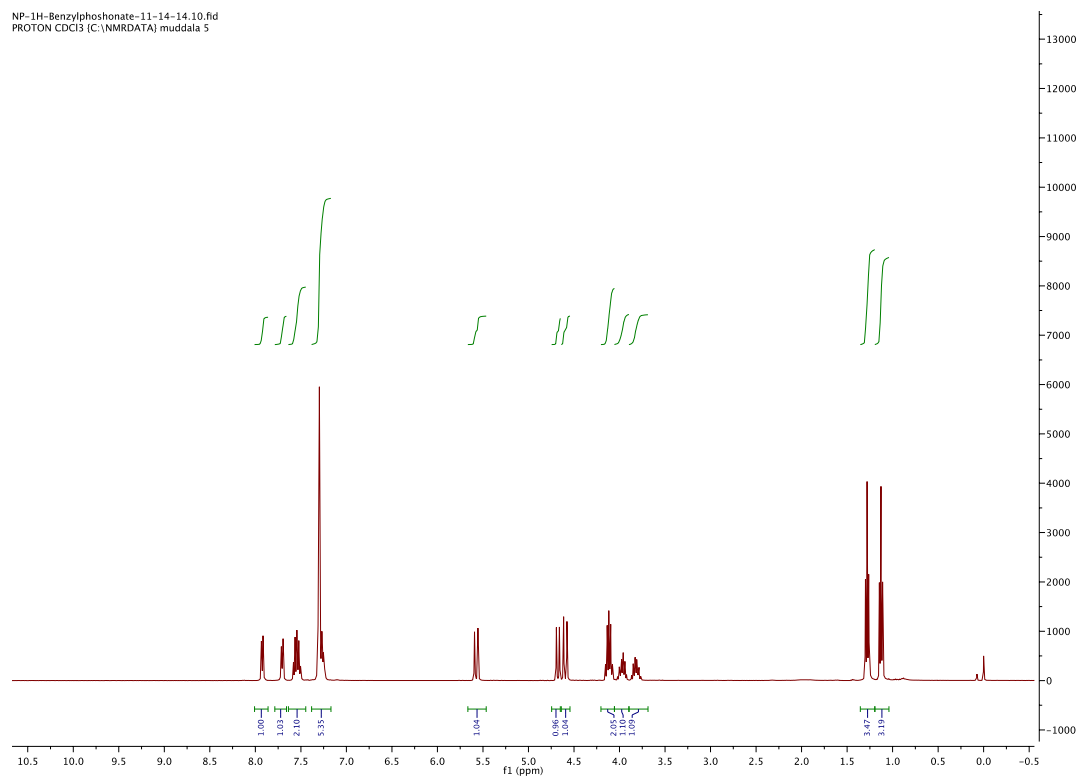

NP-13C-Benzylphosphonate-11-14-14.10.fid  
C13CPD CDCl3 (C:\NMRDATA) muddala 5

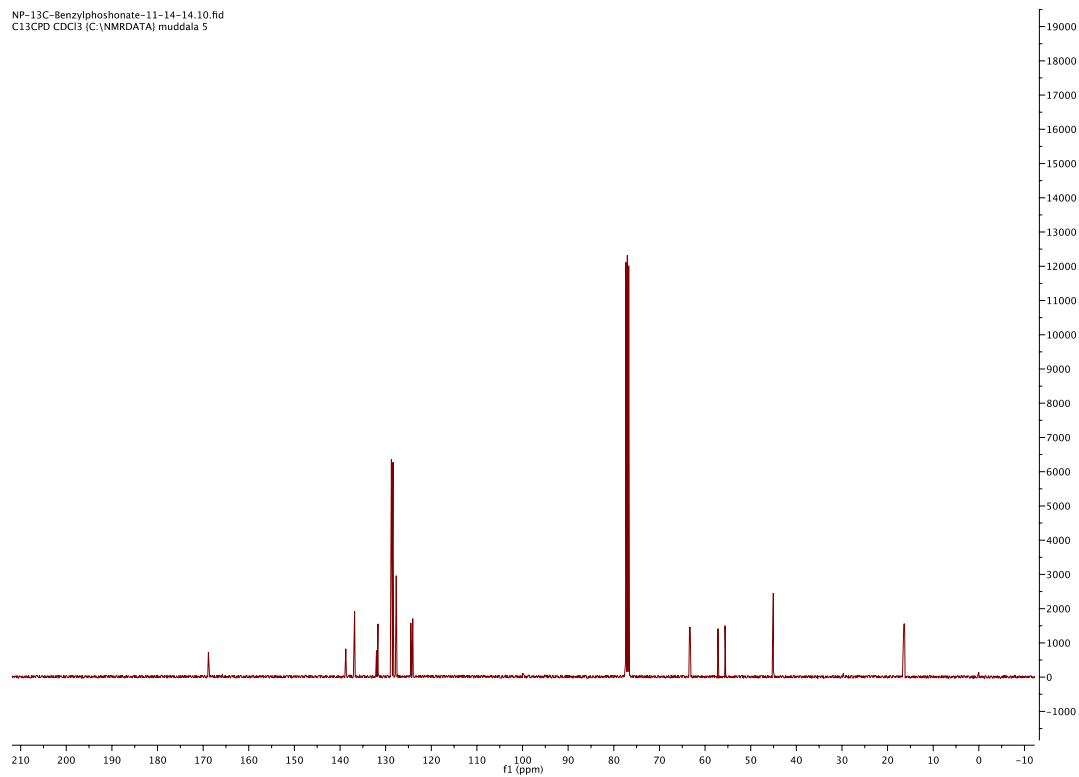

# (±)-Diethyl (2-(4-methylbenzyl)-3-oxoisindolin-1-yl)phosphonate (3b):

NP-4-methylbenzyl-12-01-14.10.fid  
PROTON CDCl3 (C:\NMRDATA) muddala 27

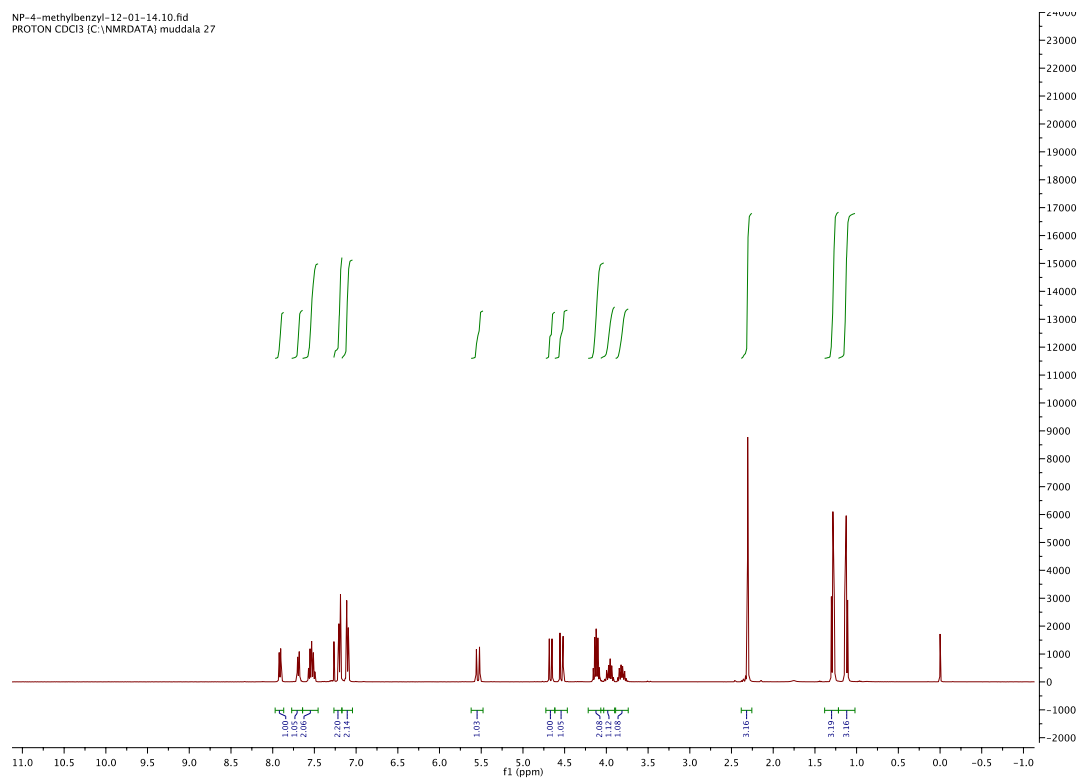

NP-13C-4-methylbenzyl-12-01-14.10.fid  
C13CPD CDCl3 (C:\NMRDATA) muddala 27

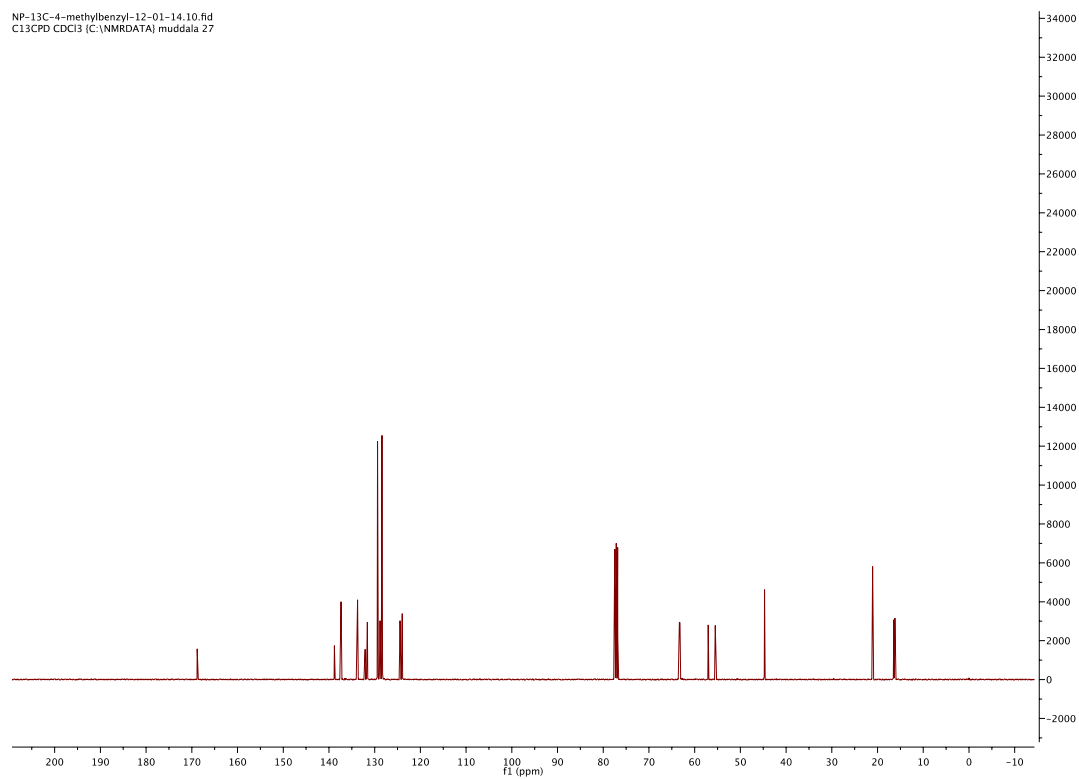

# (±)-Diethyl (3-oxo-2-(4-(trifluoromethyl)benzyl)isoindolin-1-yl)phosphonate (3c):

NP-1H-trifluoromethylbenzylphosphonate-11-31-14.10.fid  
PROTON CDCl3 [C:\NMRDATA] muddala 50

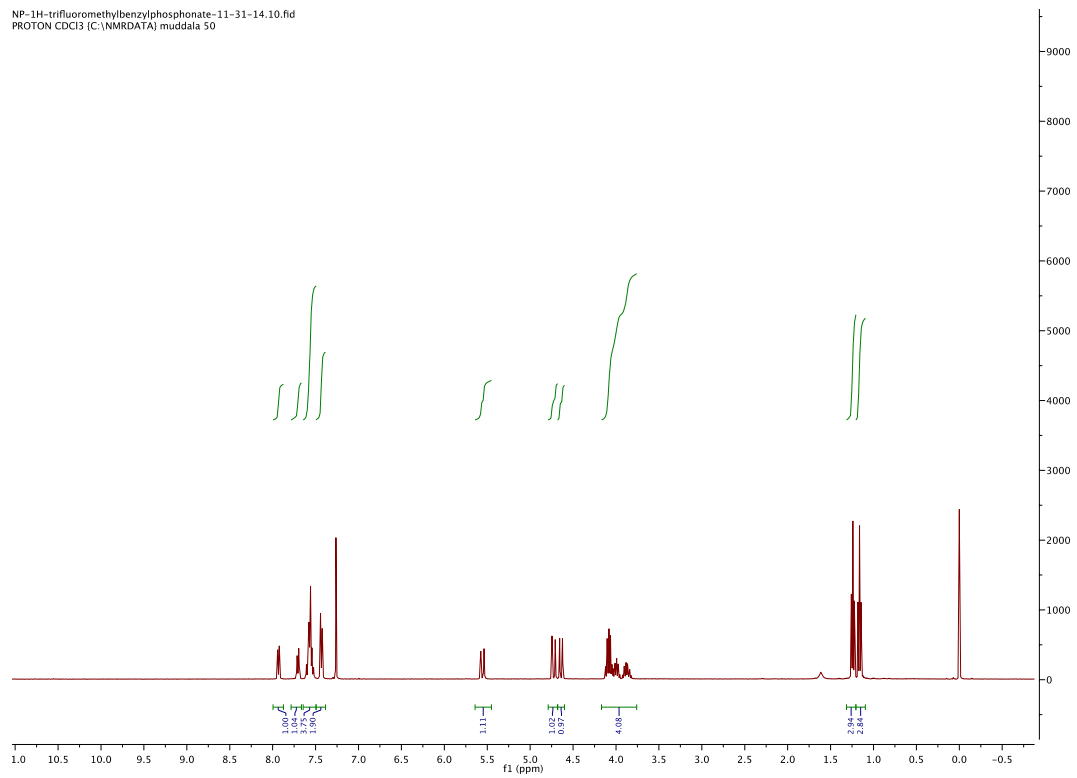

NP-1C-D-trifluoromethylbenzylphosphonate-11-31-14.10.fid  
C13CPD32 CDCl3 [C:\NMRDATA] muddala 50

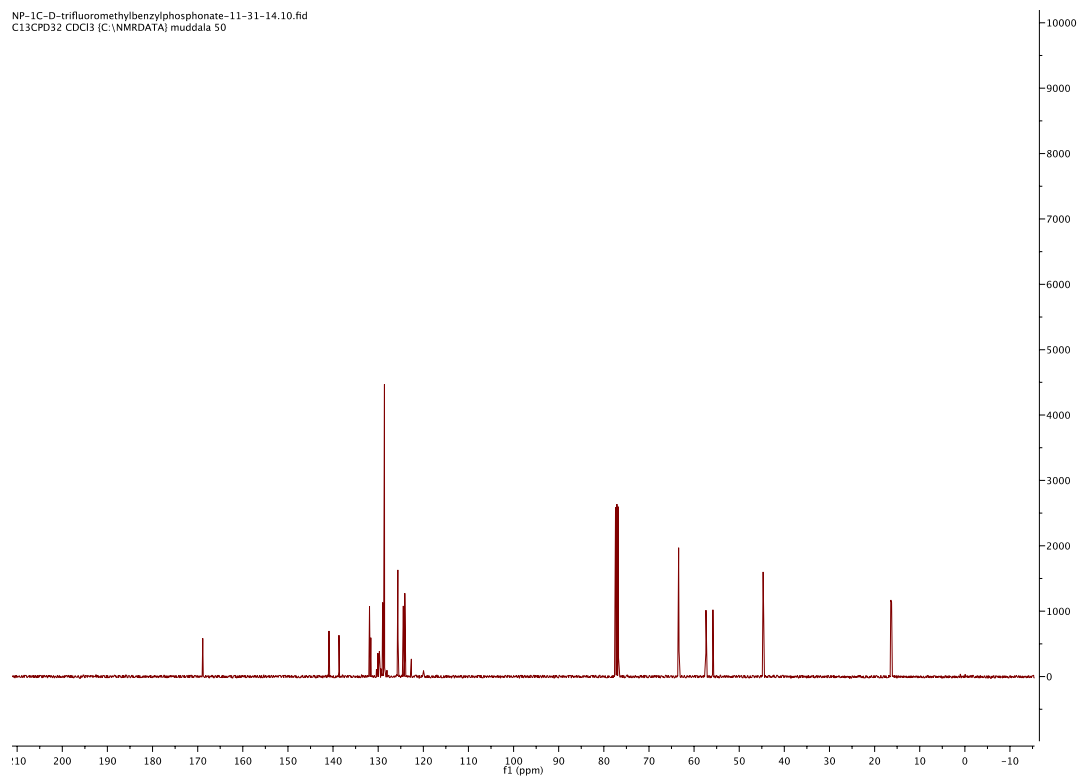

# (±)-Diethyl (2-(4-chlorobenzyl)-3-oxoisindolin-1-yl)phosphonate (3d):

NP-1H-4chlorobenzylphosphonate-11-31-14.10.fid  
PROTON CDCl3 (C:\NMRDATA) muddala 51

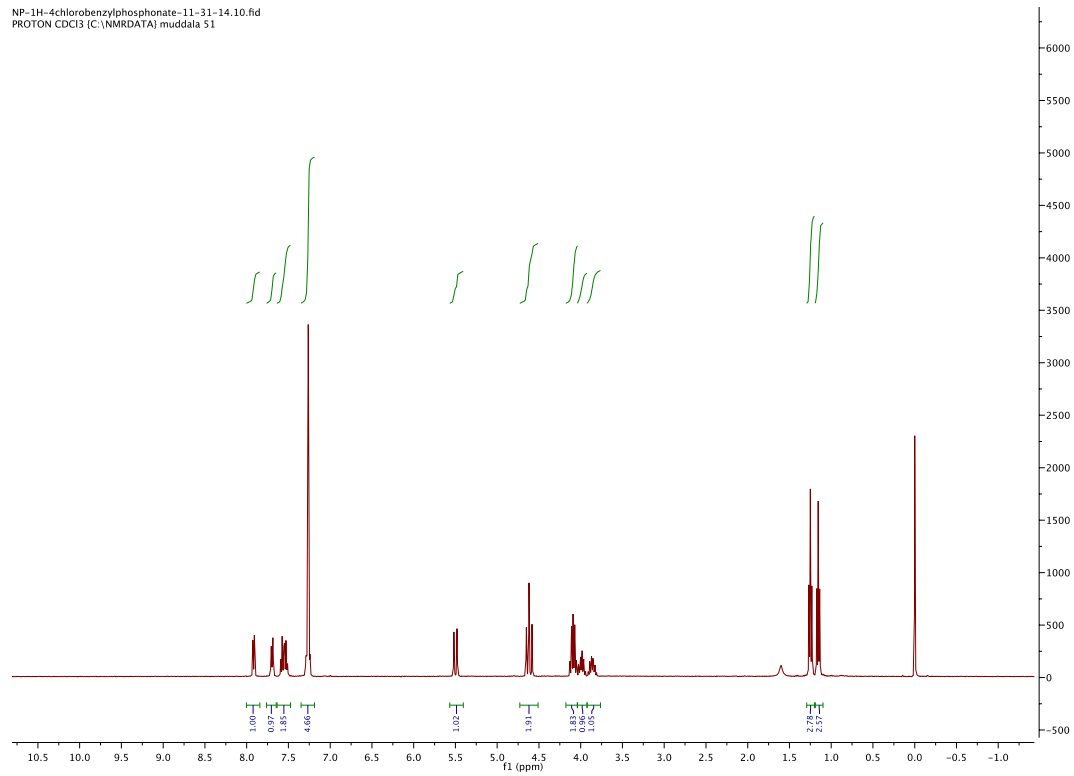

NP-13C-D-4chlorobenzylphosphonate-11-31-14.10.fid  
C13CPD32 CDCl3 (C:\NMRDATA) muddala 51

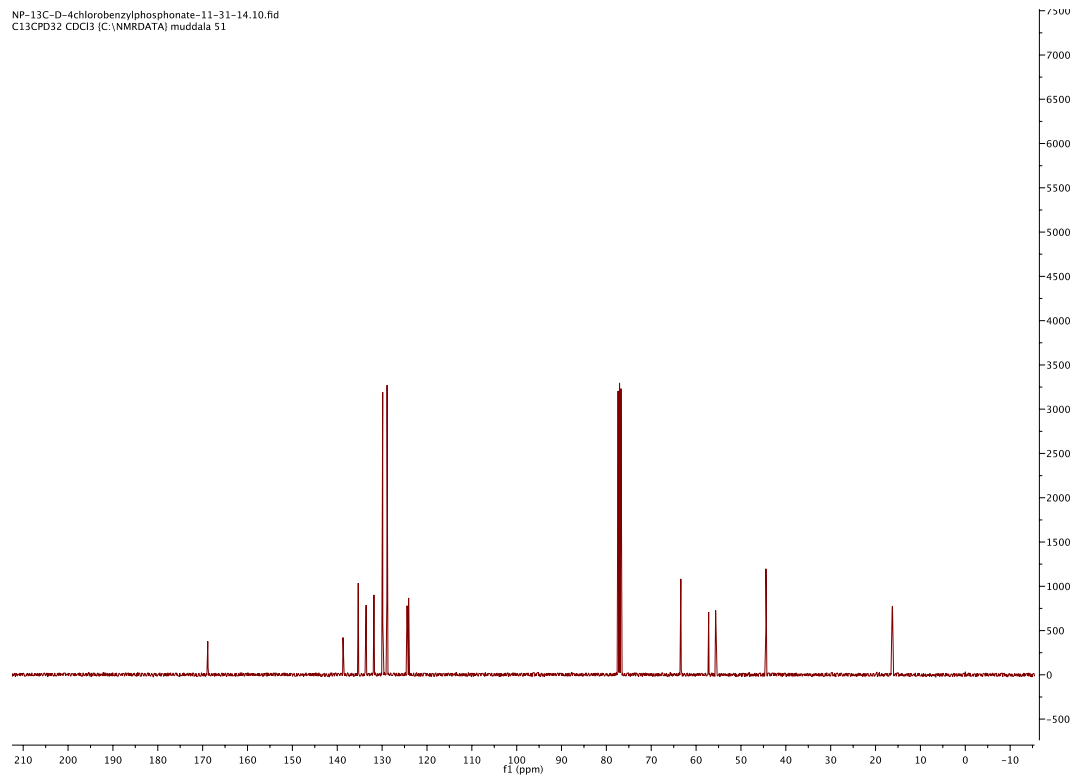



# (±)-Diethyl (2-(4-fluorobenzyl)-3-oxoisindolin-1-yl)phosphonate (3e):

NP-phosponate.10.fid  
PROTON CDCl3 (C:\NMRDATA) muddala 3

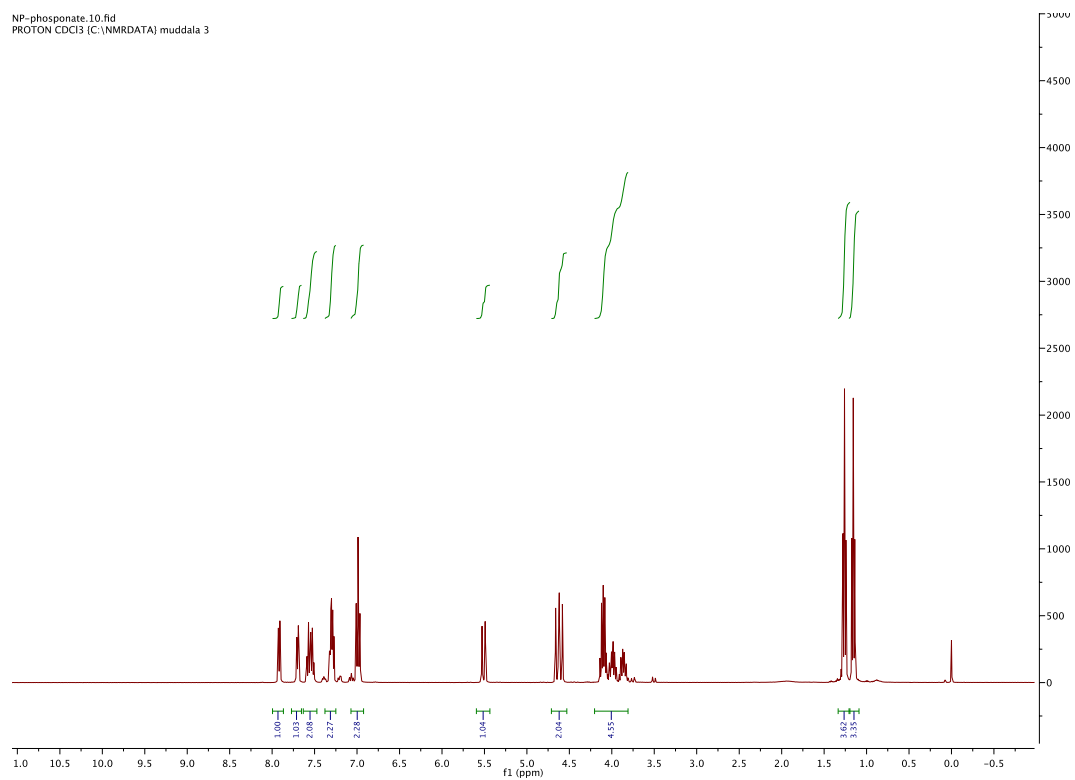

NP-13C-fluorobenzyl-12-01-14.10.fid  
C13CPD CDCl3 (C:\NMRDATA) muddala 28

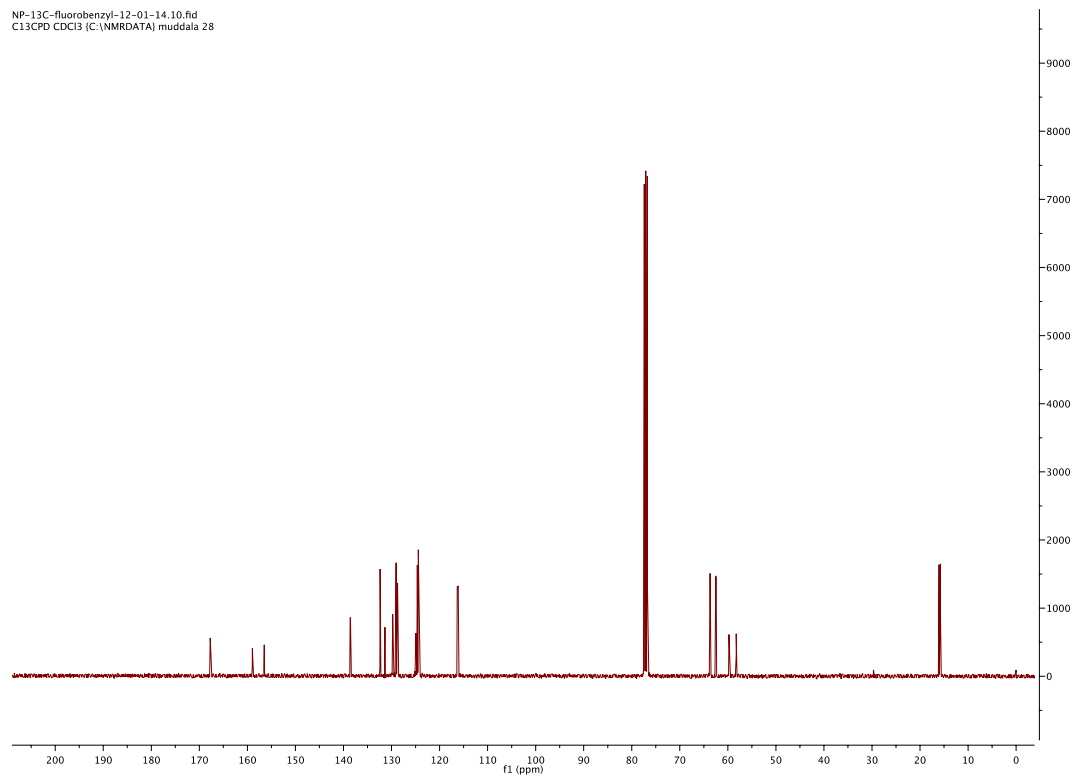

# (±)-Diethyl (2-(3-methoxybenzyl)-3-oxoisindolin-1-yl)phosphonate (3f):

NP-1H-3methoxyphosphonate-12-01-14.10.fid  
PROTON CDCl3 [C:\NMRDATA] muddala 21

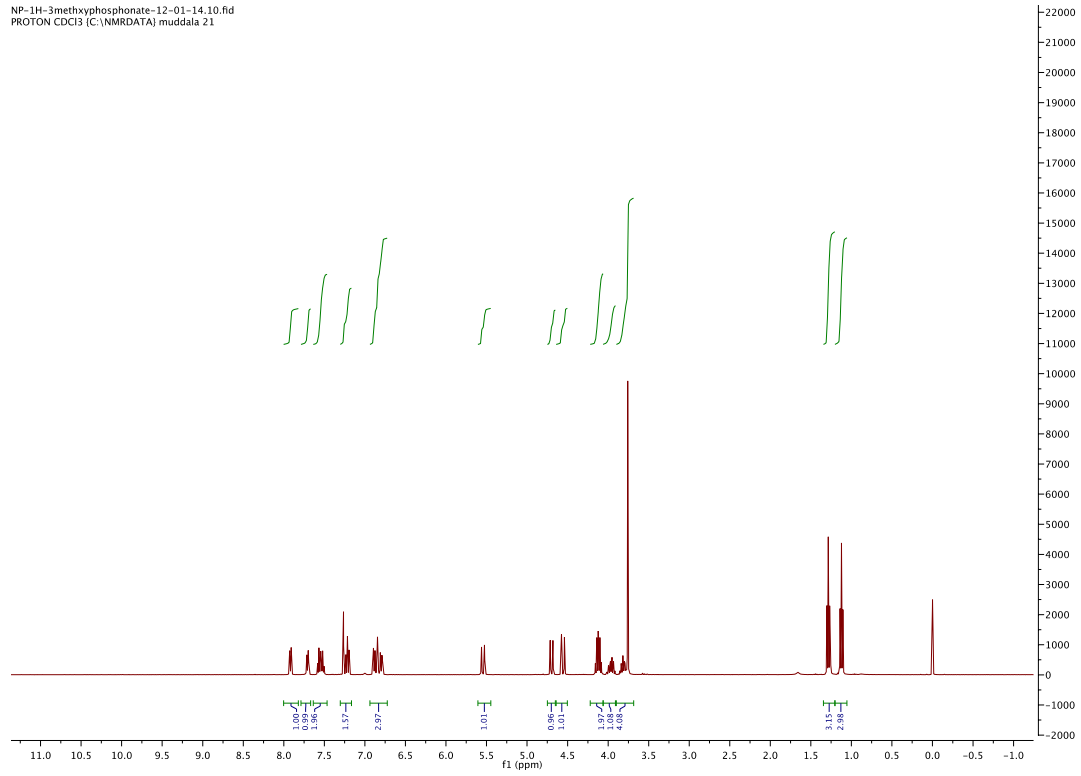

NP-13C-3methoxyphosphonate-12-01-14.10.fid  
C13CPD32 CDCl3 [C:\NMRDATA] muddala 21

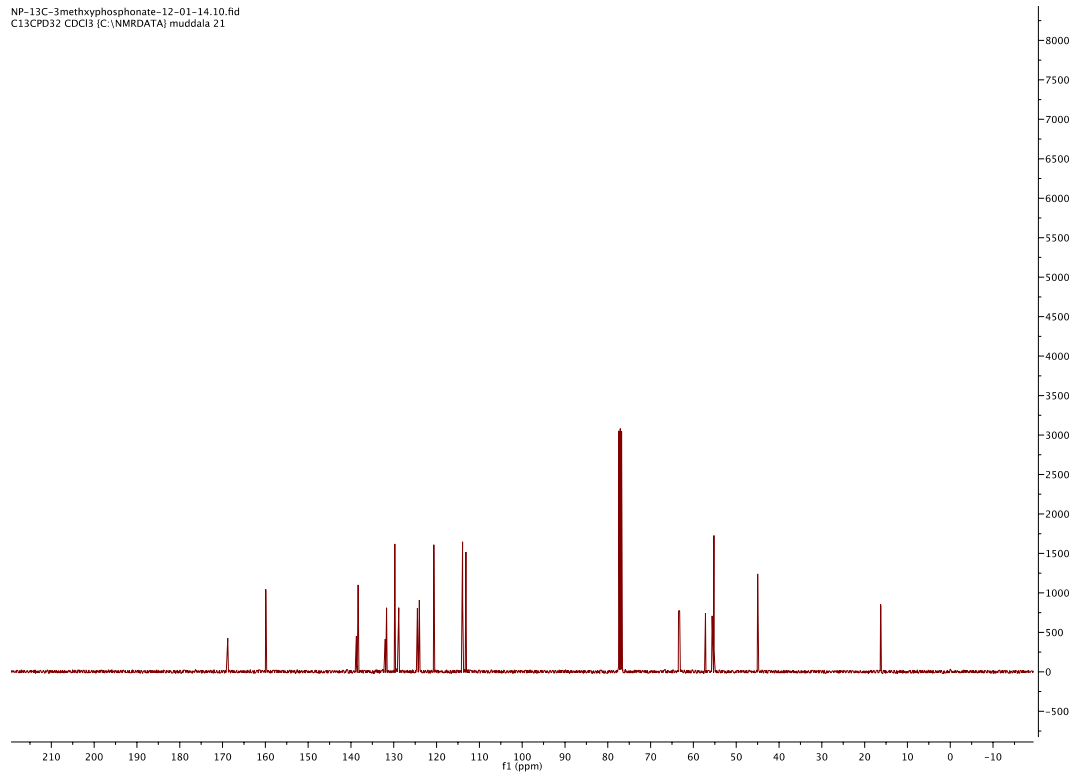

# (±)-Diethyl (2-(4-methoxybenzyl)-3-oxoisindolin-1-yl)phosphonate (3g):

NP-1H-paramethoxybenzyl-11-30-14.10.fid  
PROTON CDCl3 [C:\NMRDATA] muddala 35

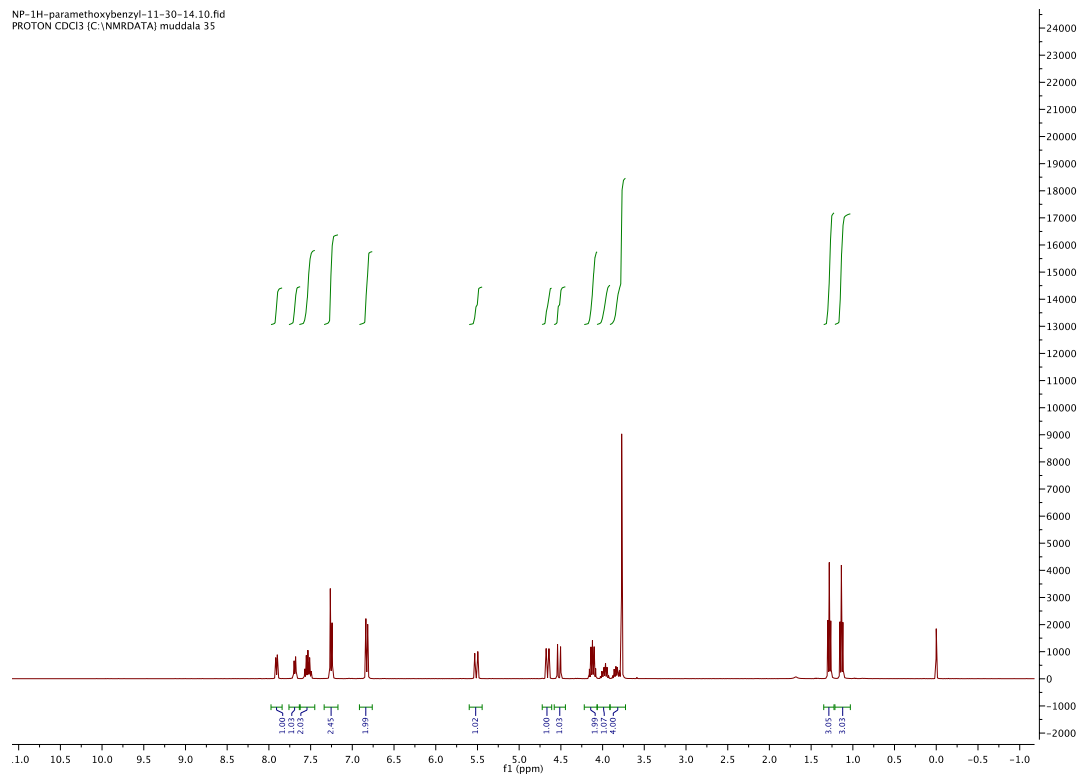

NP-13C-paramethoxybenzyl-11-30-14.10.fid  
C13CPD CDCl3 [C:\NMRDATA] muddala 35

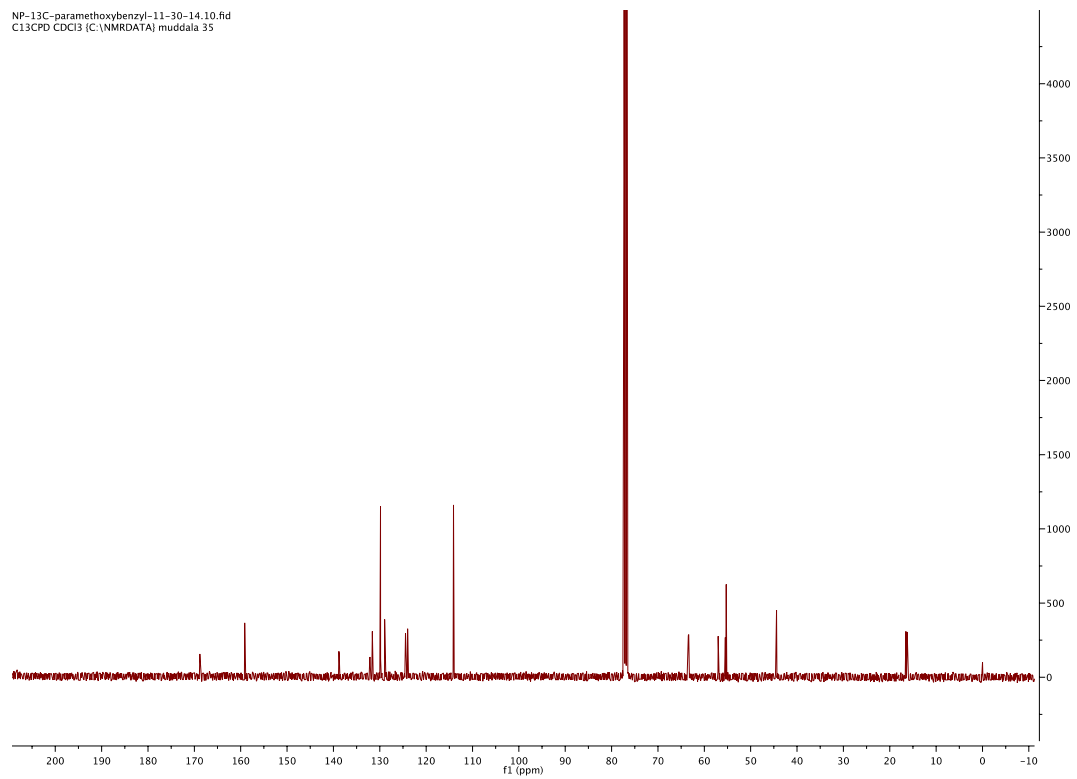

# (±)-Diethyl (3-oxo-2-phenylisoindolin-1-yl)phosphonate (3h):

NP-13H-aniline-12-01-14.10.fid  
PROTON CDCl3 [C:\NMRDATA] muddala 36

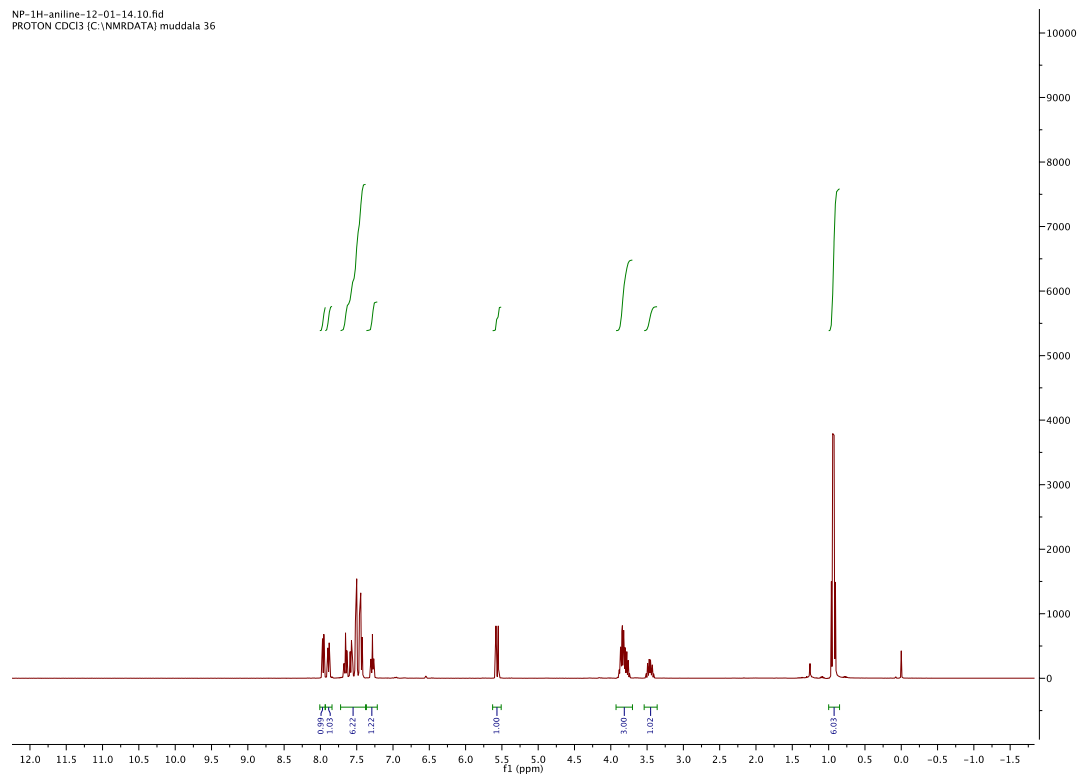

NP-13C-aniline-12-01-14.10.fid  
C13CPD32 CDCl3 [C:\NMRDATA] muddala 36

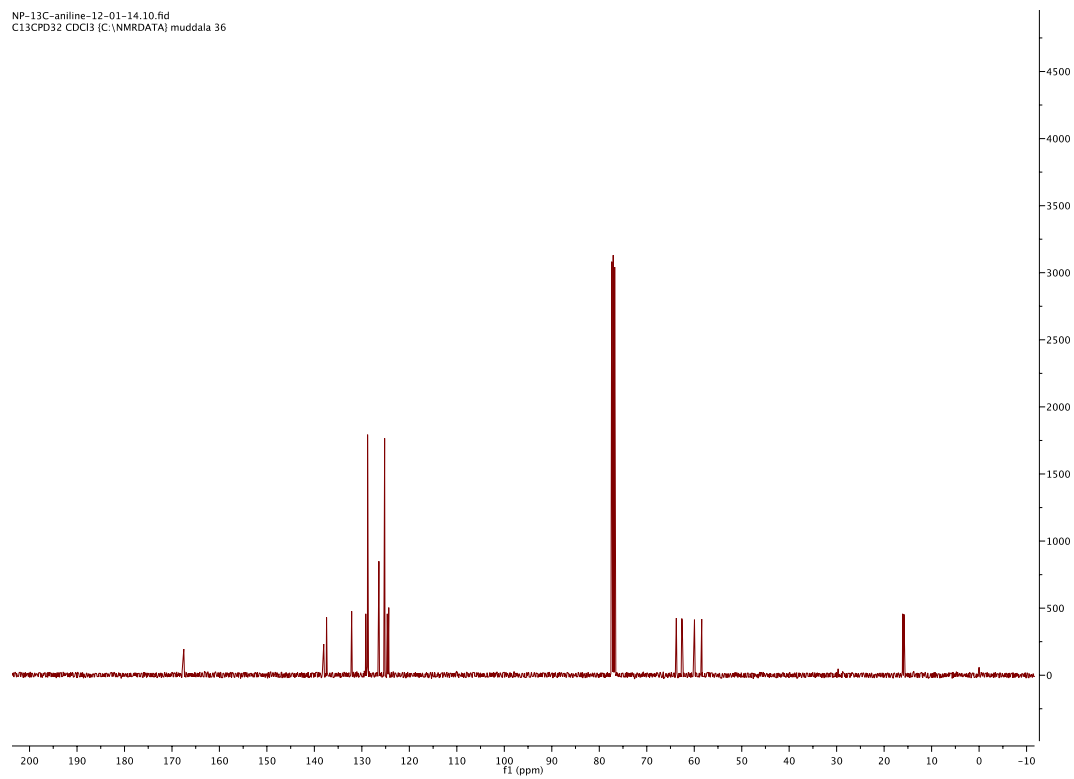

# (±)-Diethyl [2-(2-methylphenyl)-3-oxoisindolin-1-yl]phosphonate (3i):

NP-1H-Orthotoluidine-12-02-14.10.fid  
PROTON CDCl3 [C:\NMRDATA] muddala 4

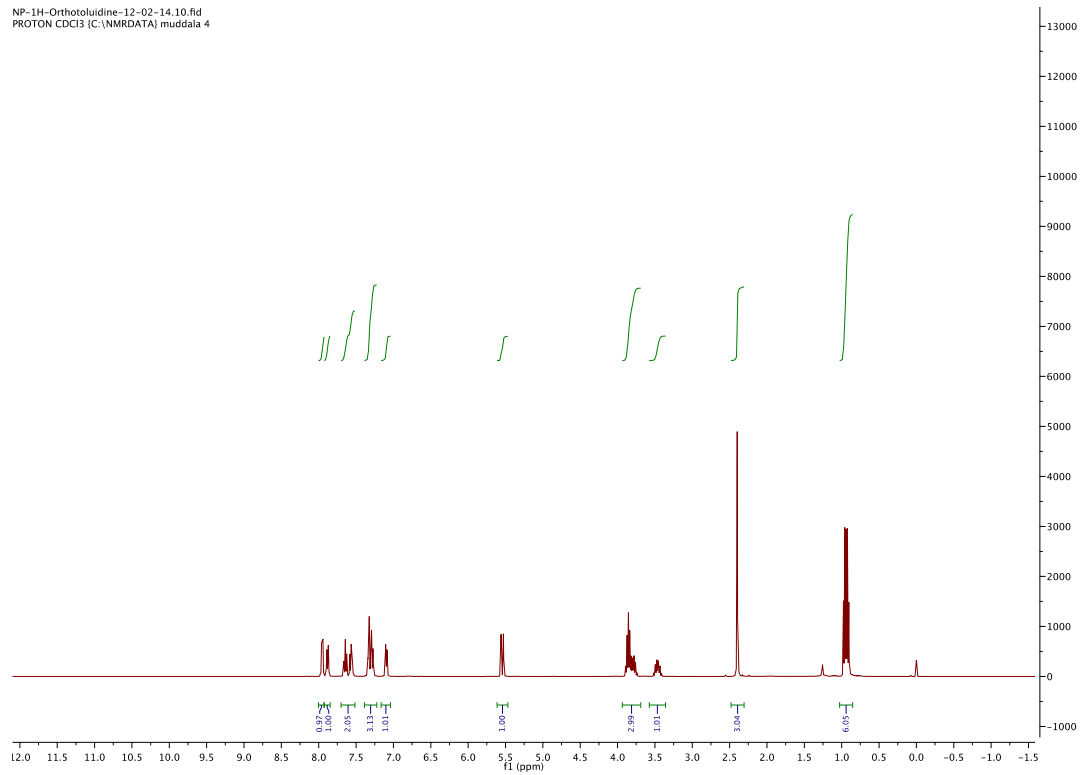

NP-13C-Orthotoluidine-12-02-14.10.fid  
C13CPD CDCl3 [C:\NMRDATA] muddala 4

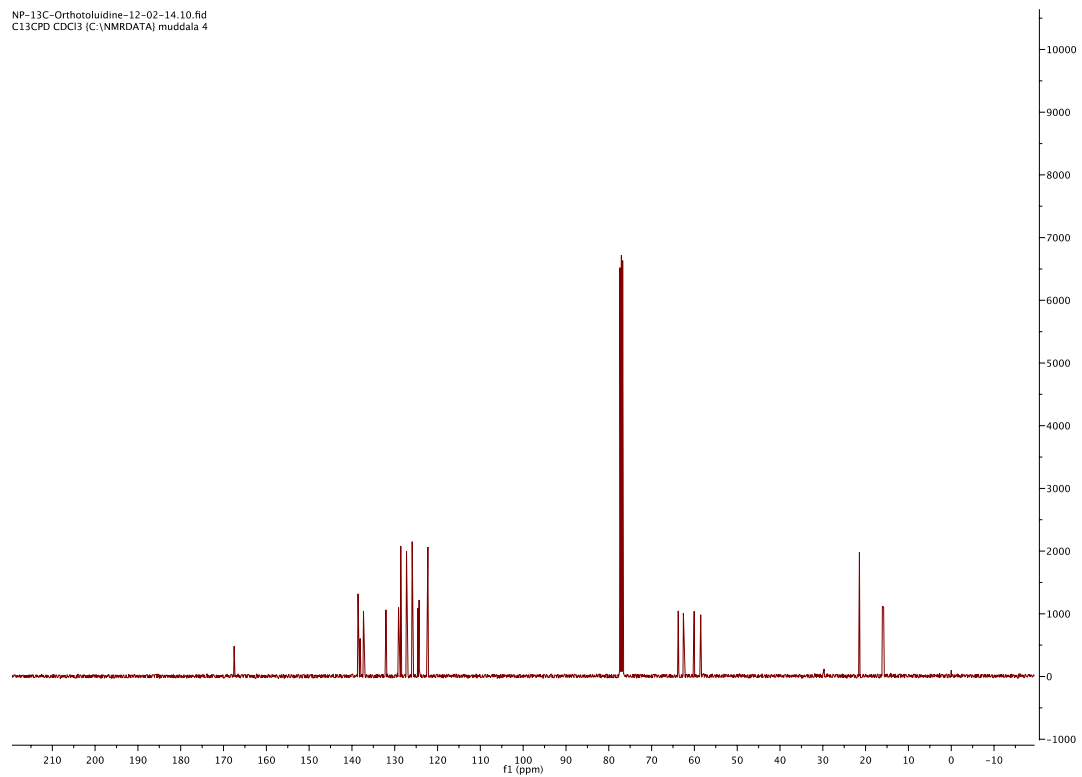

# (±)-Diethyl [2-(4-methylphenyl)-3-oxoisoindolin-1-yl]phosphonate (3j):

NP-1H-4methylaniline-12-01-14.10.fid  
PROTON CDCl3 [C:\NMRDATA] muddala 35

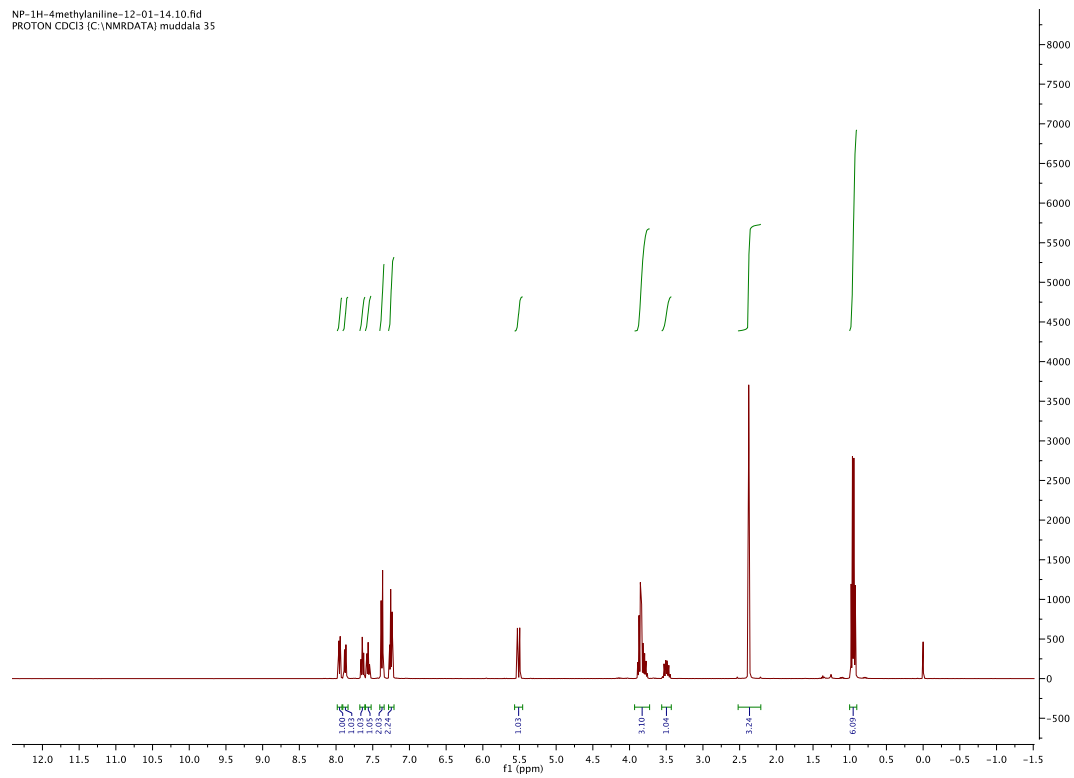

NP-13C-4methylaniline-12-01-14.10.fid  
C13CPD CDCl3 [C:\NMRDATA] muddala 35

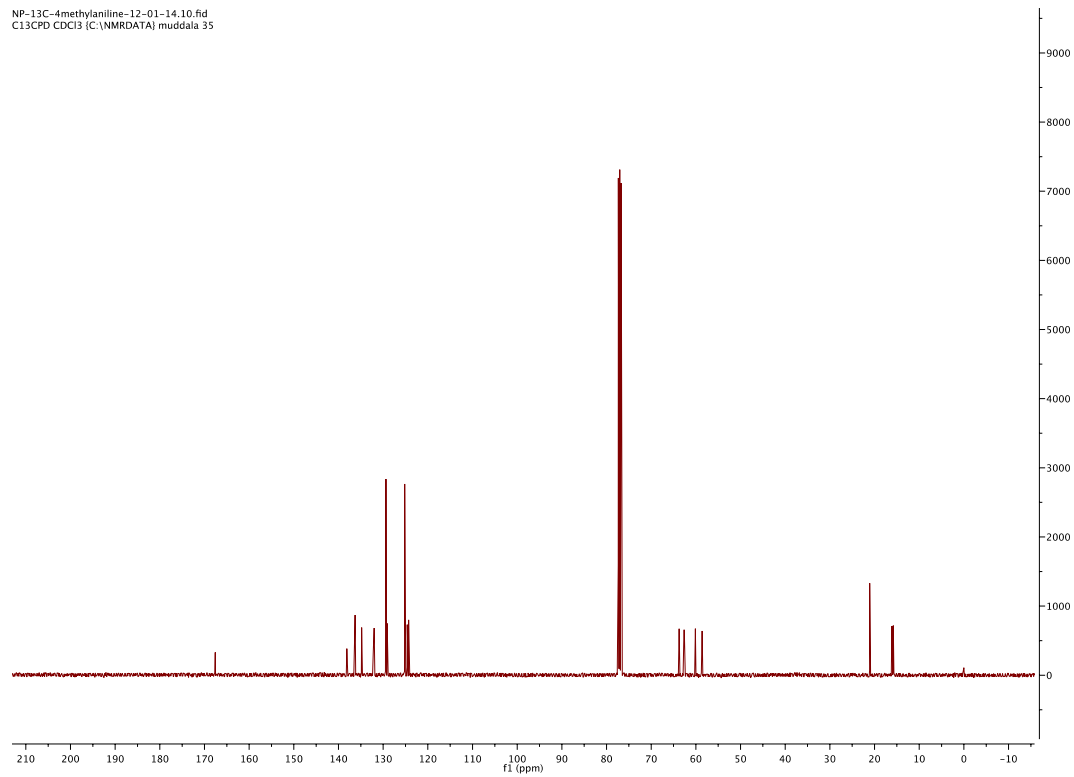

# (±)-Diethyl (2-(4-chlorophenyl)-3-oxoisindolin-1-yl)phosphonate (3k):

NP-1H-Toluidinephosphonate-11-21-14.10.fid  
PROTON CDCl3 (C:\NMRDATA) muddala 5

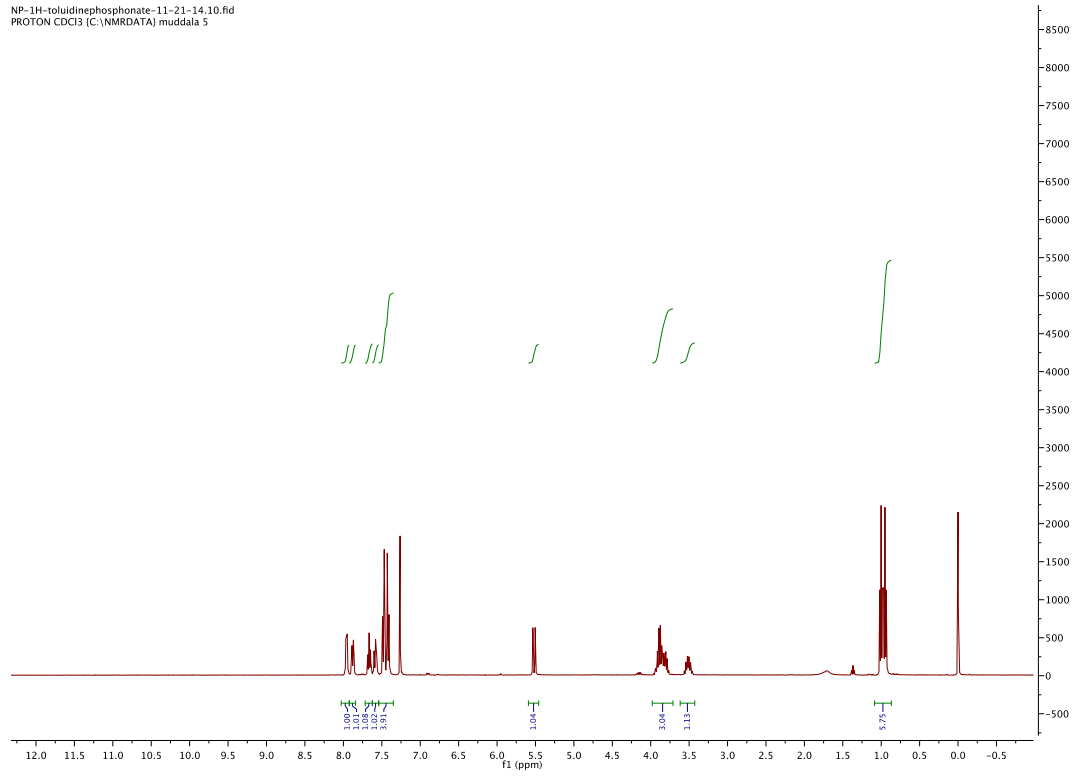

NP-13C-Toluidinephosphonate-11-20-14.10.fid  
C13CPD CDCl3 (C:\NMRDATA) muddala 11

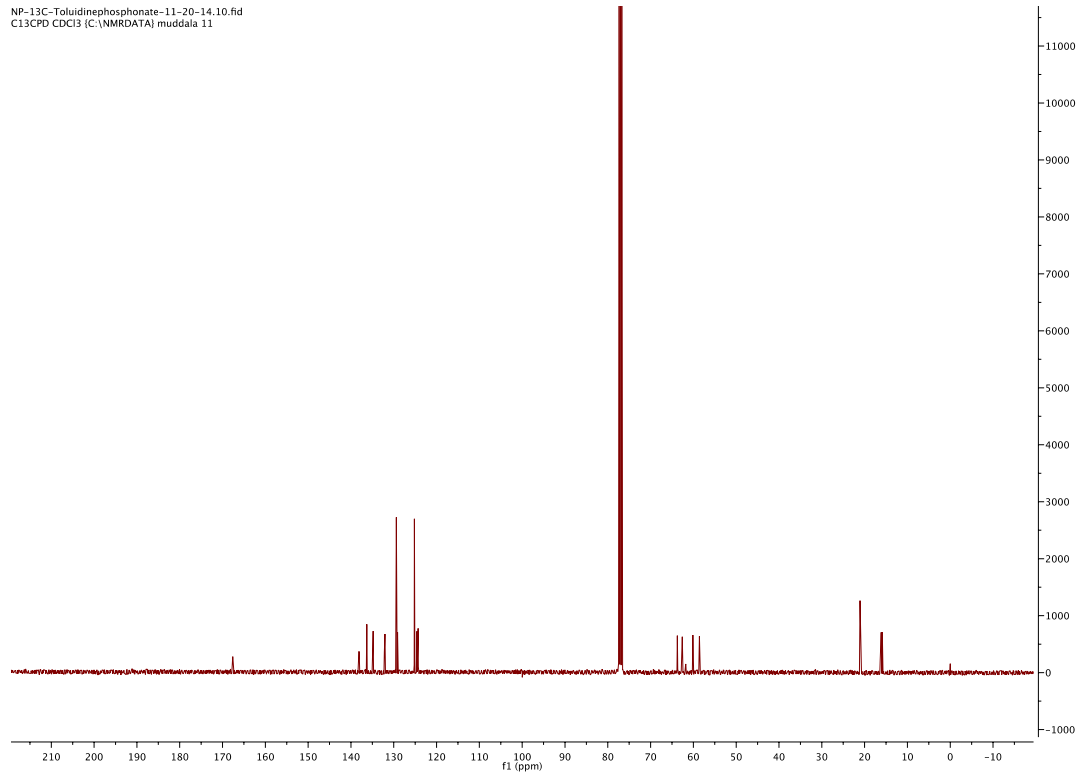

# (±)-Diethyl (2-(2-fluorophenyl)-3-oxoisindolin-1-yl)phosphonate (3l):

NP-2-fluorobenzyl-12-01-14.10.fid  
PROTON CDCl3 [C:\NMRDATA] muddala 28

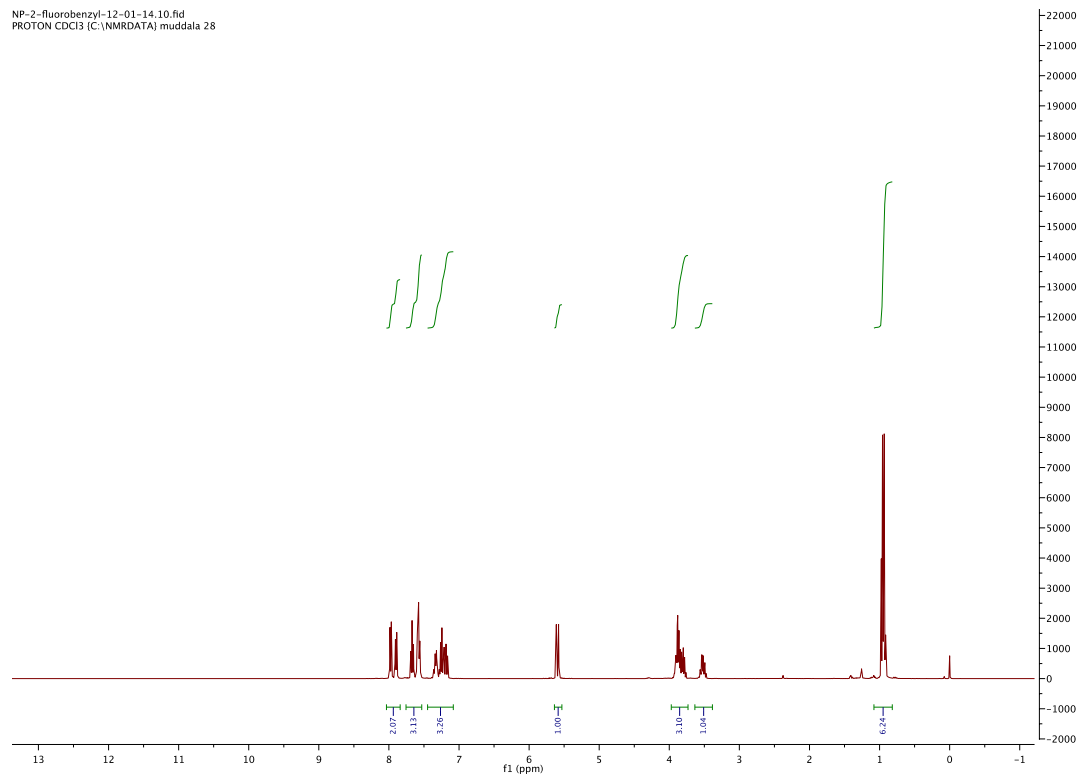

NP-13C-fluorobenzyl-12-01-14.10.fid  
C13CPD CDCl3 [C:\NMRDATA] muddala 28

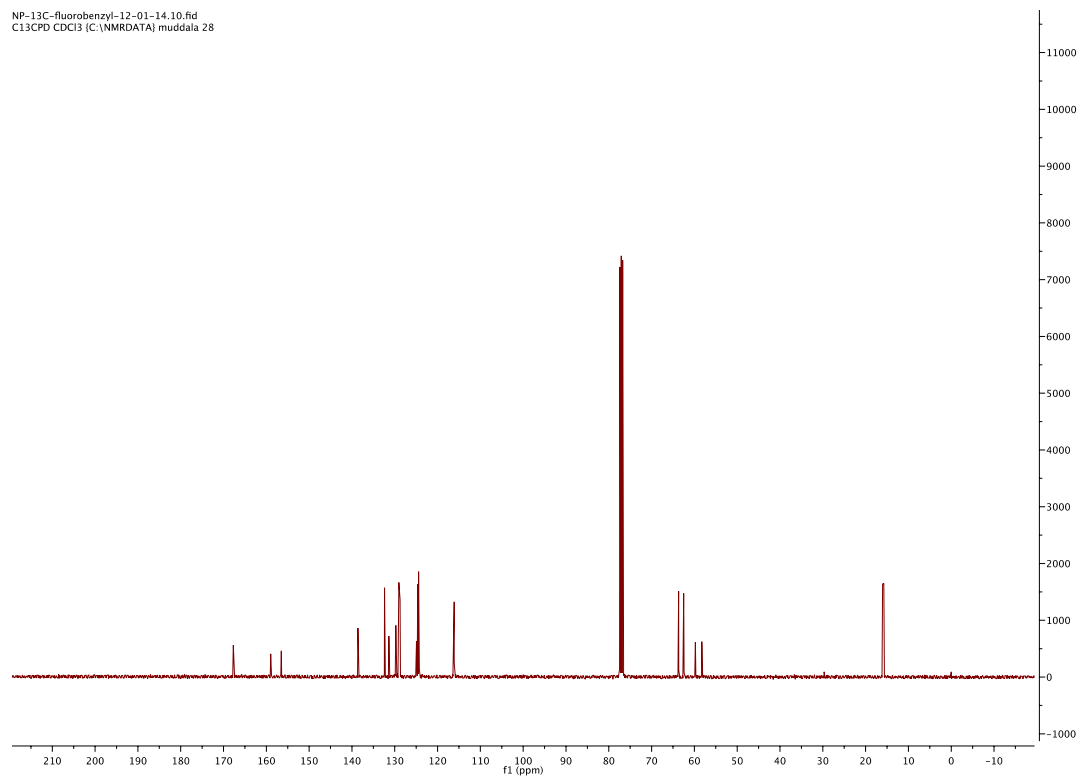



# (±)-Diethyl (2-(4-fluorophenyl)-3-oxoisindolin-1-yl)phosphonate (3m):

NP-1H-parafuoroaniline-12-09-14.10.fid  
PROTON CDCl3 [C:\NMRDATA] muddala 15

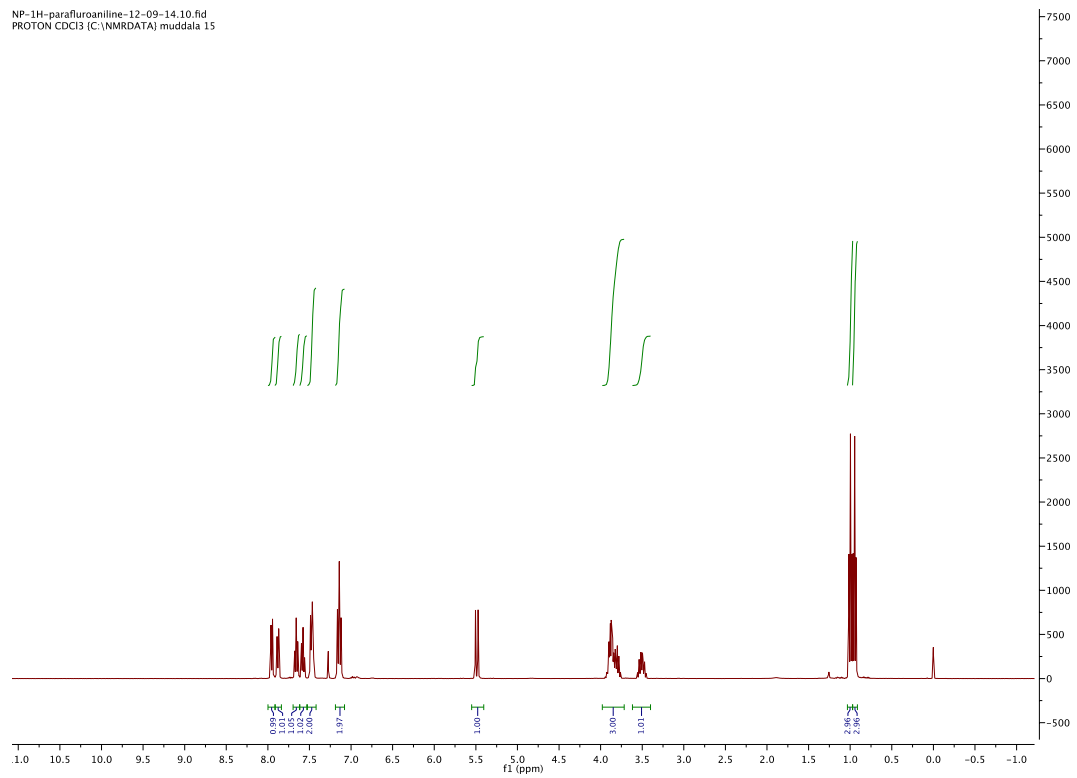

NP-13C-fluorobenzyl-12-01-14.10.fid  
C13CPD CDCl3 [C:\NMRDATA] muddala 28

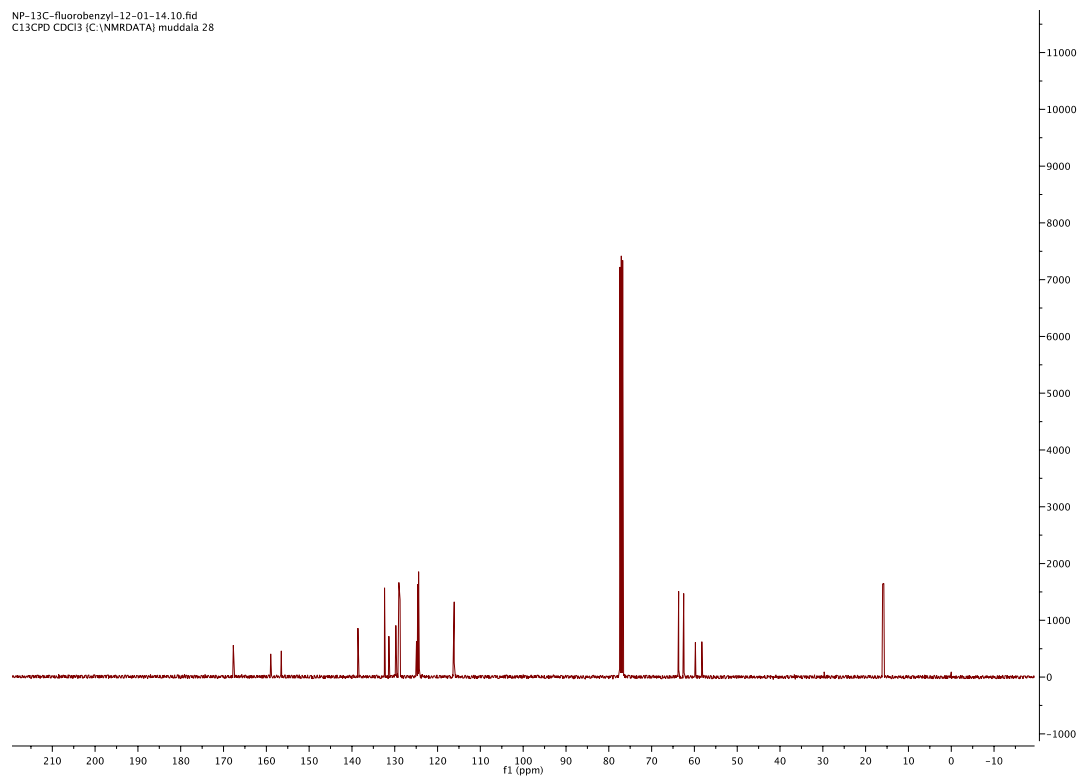

# (±)-Diethyl (2-(3-methoxyphenyl)-3-oxoisindolin-1-yl)phosphonate (3n):

NP-MetaAnisidine-12-02-14.10.fid  
PROTON CDCl3 [C:\NMRDATA] muddala 57

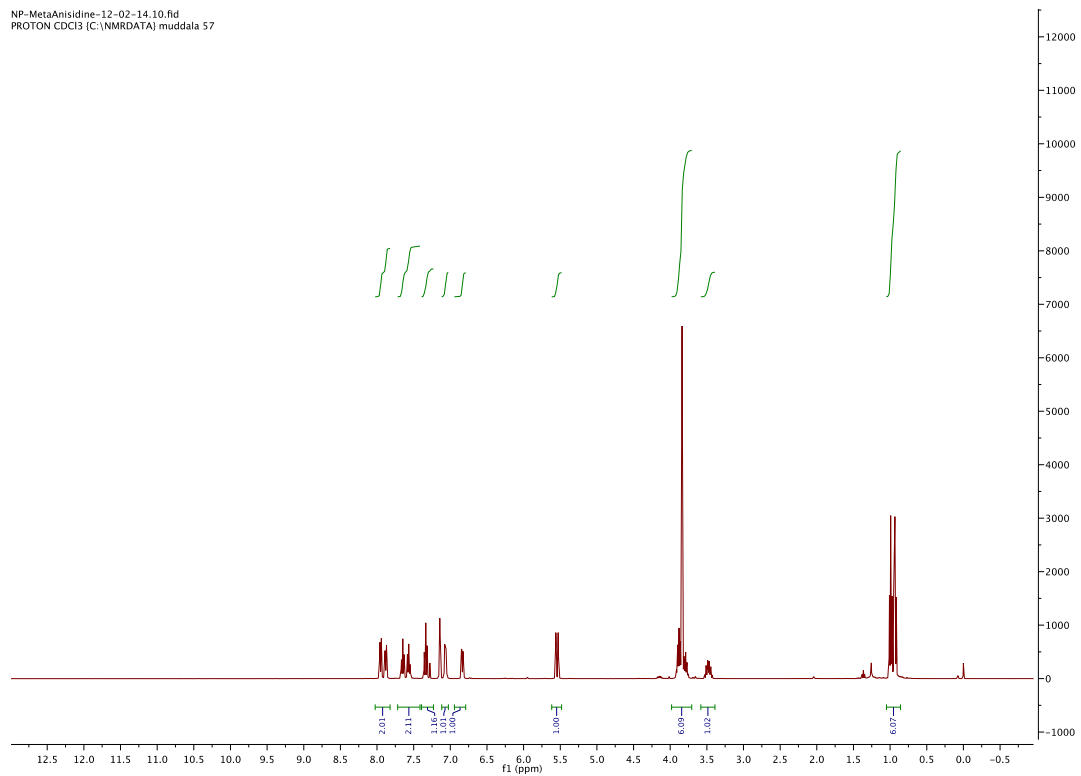

NP-13C-MetaAnisidine-12-02-14.10.fid  
C13CPD CDCl3 [C:\NMRDATA] muddala 57

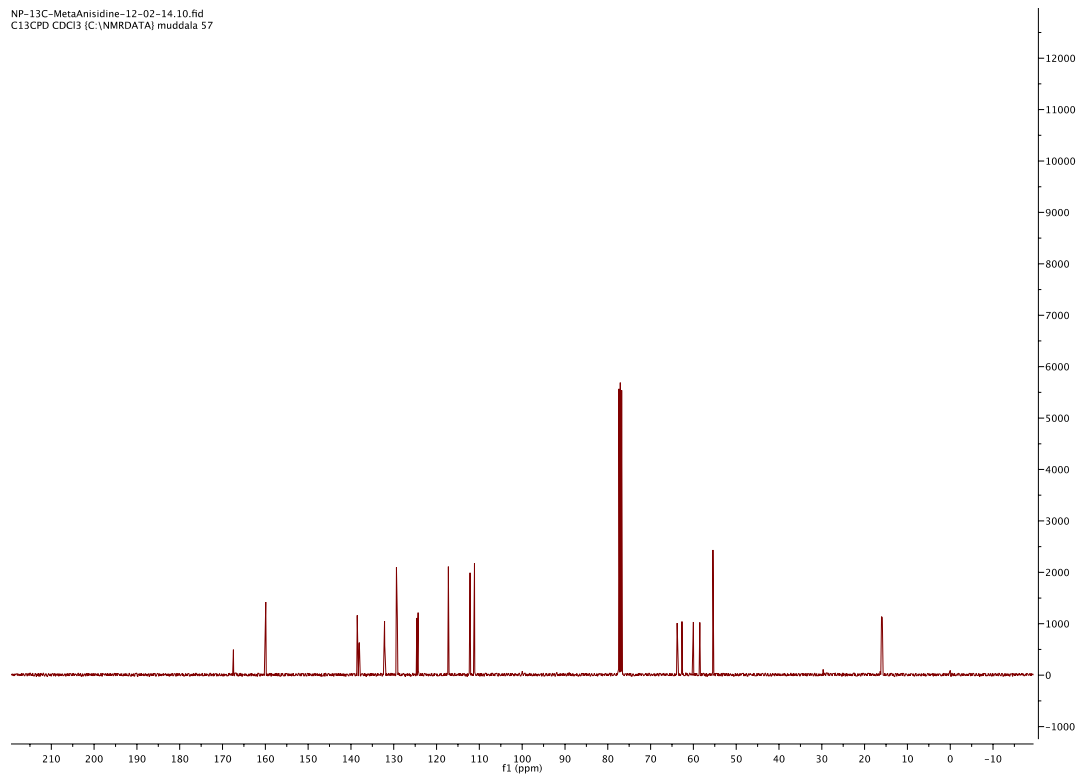

# (±)-Diethyl (2-(4-methoxyphenyl)-3-oxoisindolin-1-yl)phosphonate (3o):

NP-1H-panisidine-2-12-05-14.10.fid  
PROTON CDCl3 [C:\NMRDATA] muddala 19

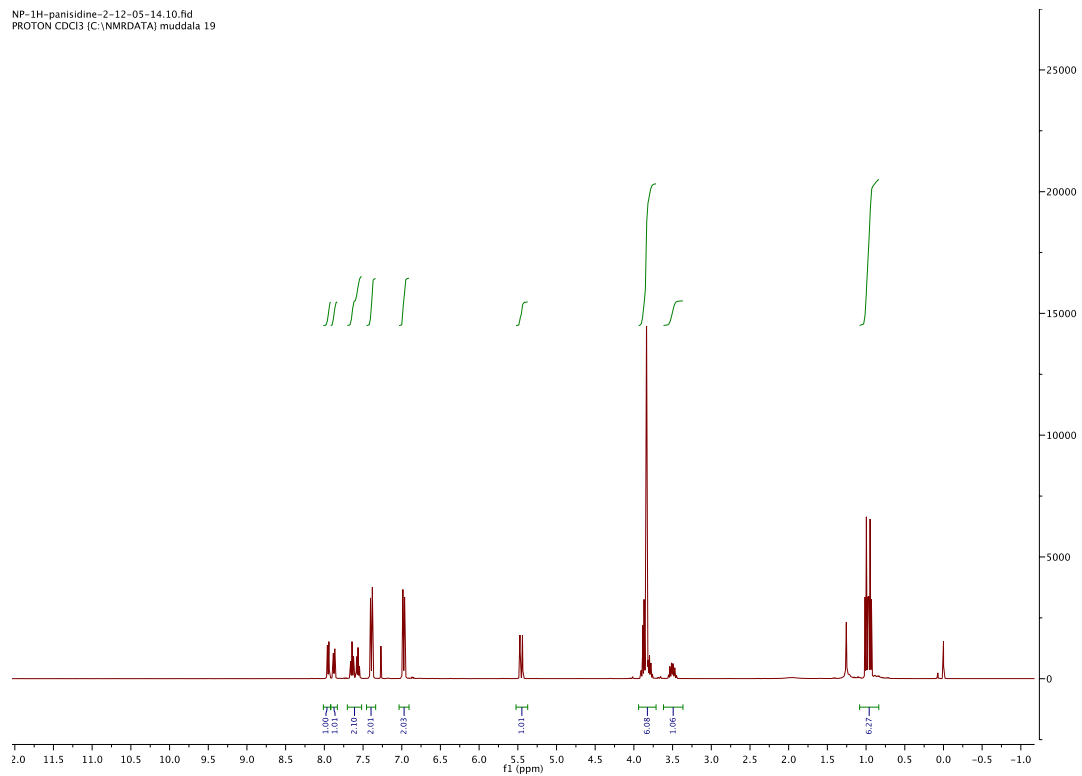

NP-13C-panisidine-2-12-05-14.10.fid  
C13CPD32 CDCl3 [C:\NMRDATA] muddala 19

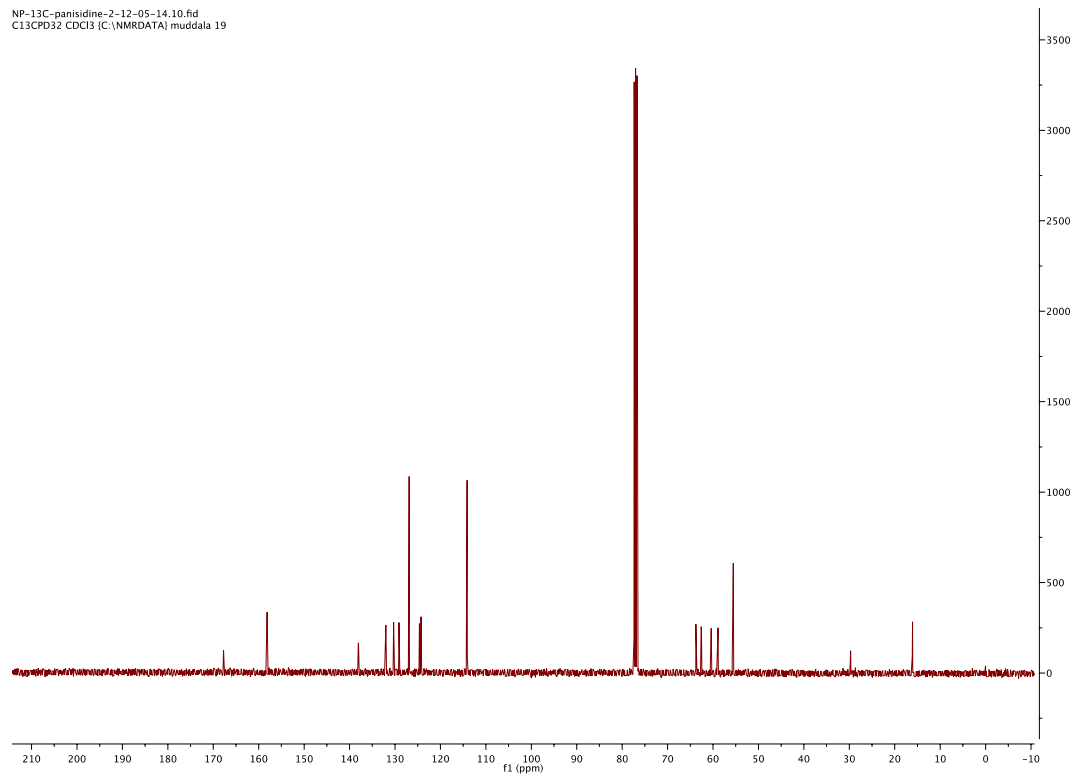

# (±)-Diethyl (3-oxo-2-(4-(trifluoromethoxy)phenyl)isoindolin-1-yl)phosphonate (3p):

NP-1H-trifluoromethoxy-12-09-14.10.fid  
PROTON CDCl3 [C:\NMRDATA] muddala 16

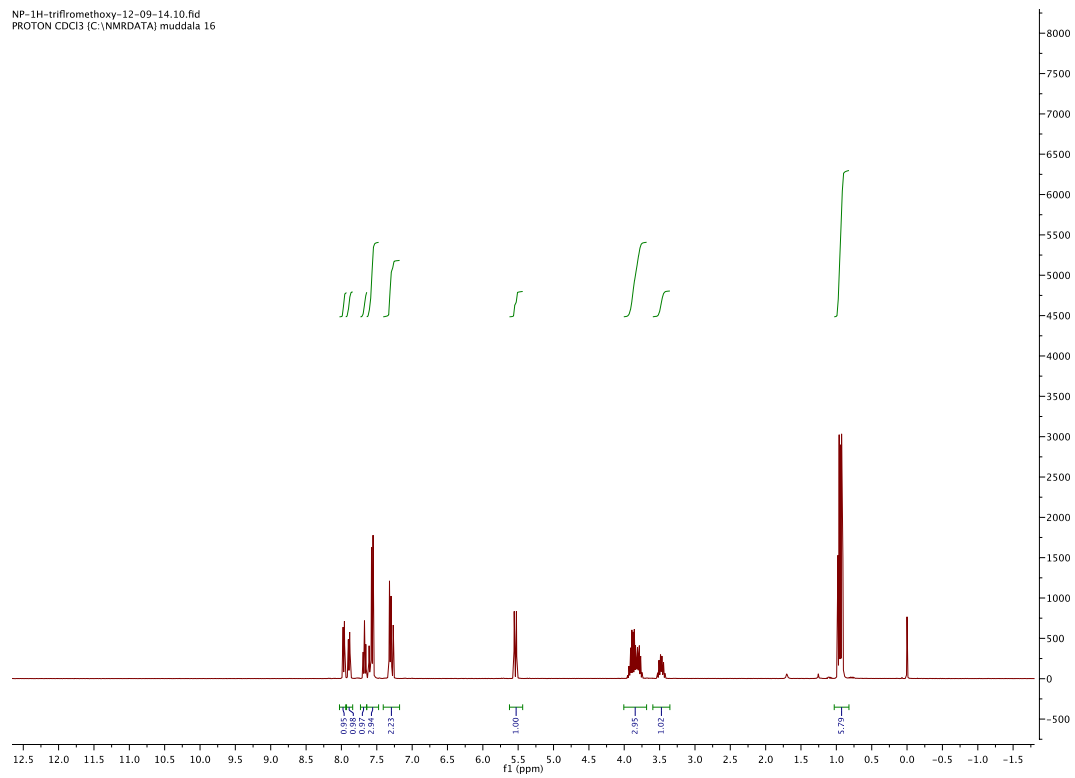

NP-13C-trifluoromethoxy-12-09-14.10.fid  
C13CPD32 CDCl3 [C:\NMRDATA] muddala 16

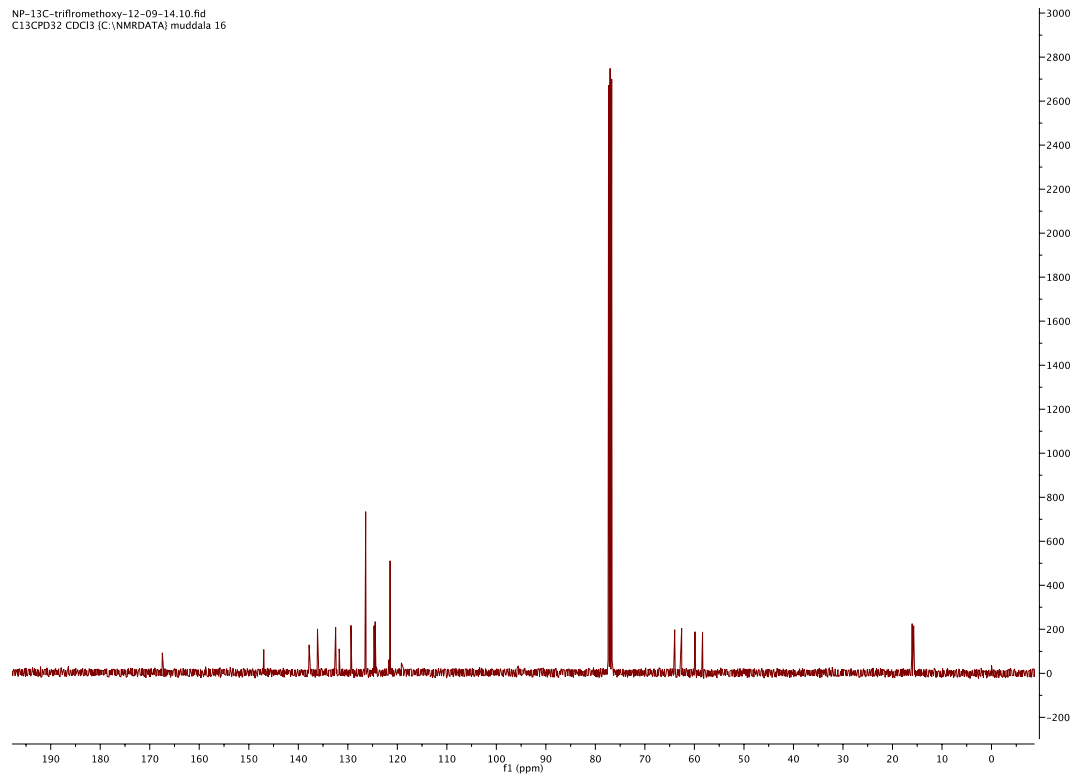

# (±)-Diethyl (3-oxo-2-phenethylisoindolin-1-yl)phosphonate (3q):

NP-1H-phentylphosphate-11-30-14.10.fid  
PROTON CDCl3 (C:\NMRDATA) muddala 33

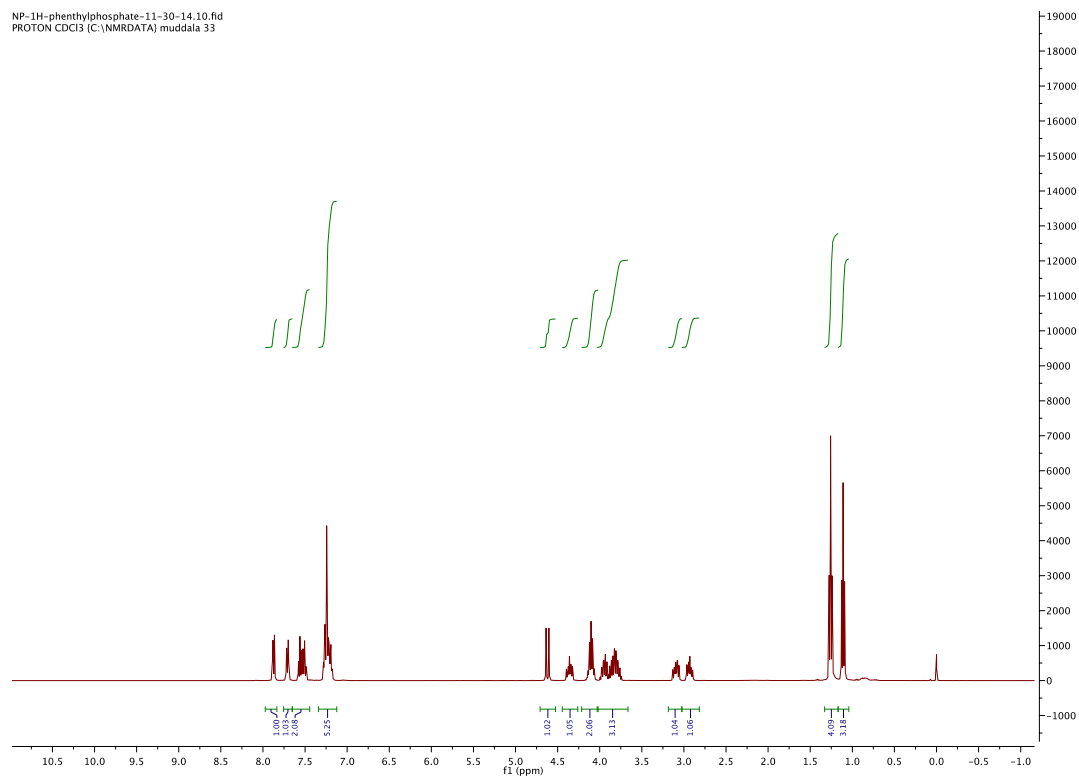

NP-13C-phentylphosphate-11-30-14.10.fid  
C13CPD CDCl3 (C:\NMRDATA) muddala 33

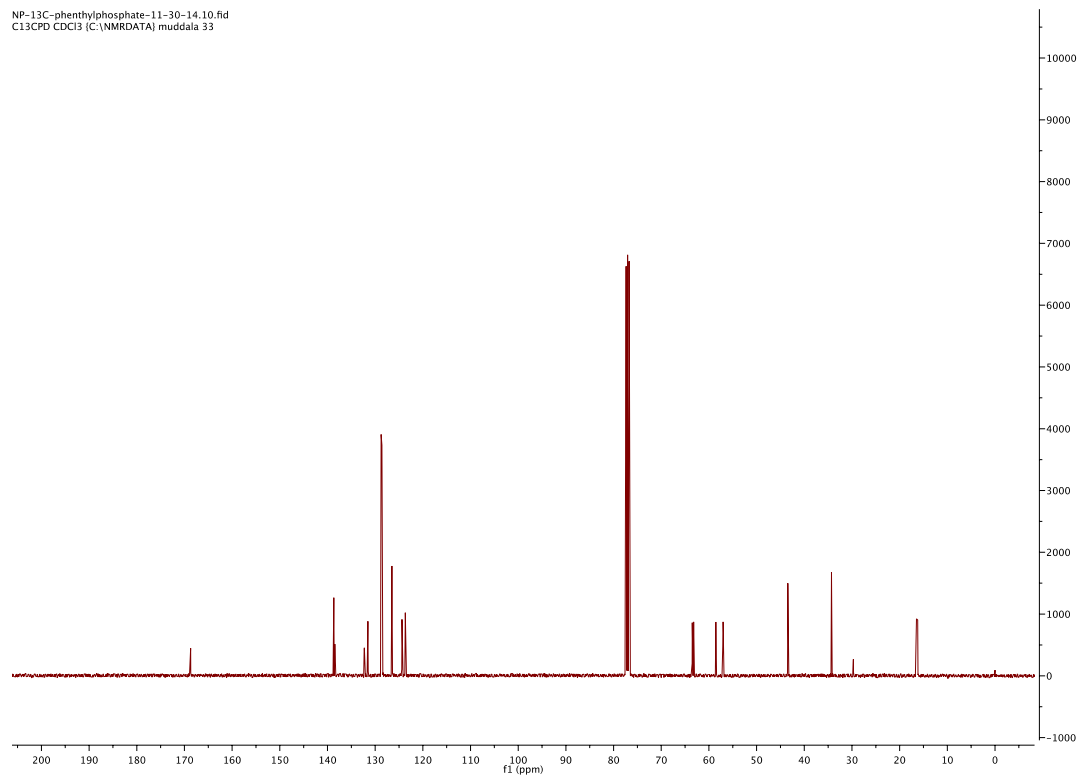

### (±)-Diethyl (3-oxo-2-(5,6,7,8-tetrahydronaphthalen-1-yl)isoindolin-1-yl)phosphonate (3r):

NP-1H-naphthylamine-12-04-14.10.fid  
PROTON CDCl3 [C:\NMRDATA] muddala 29

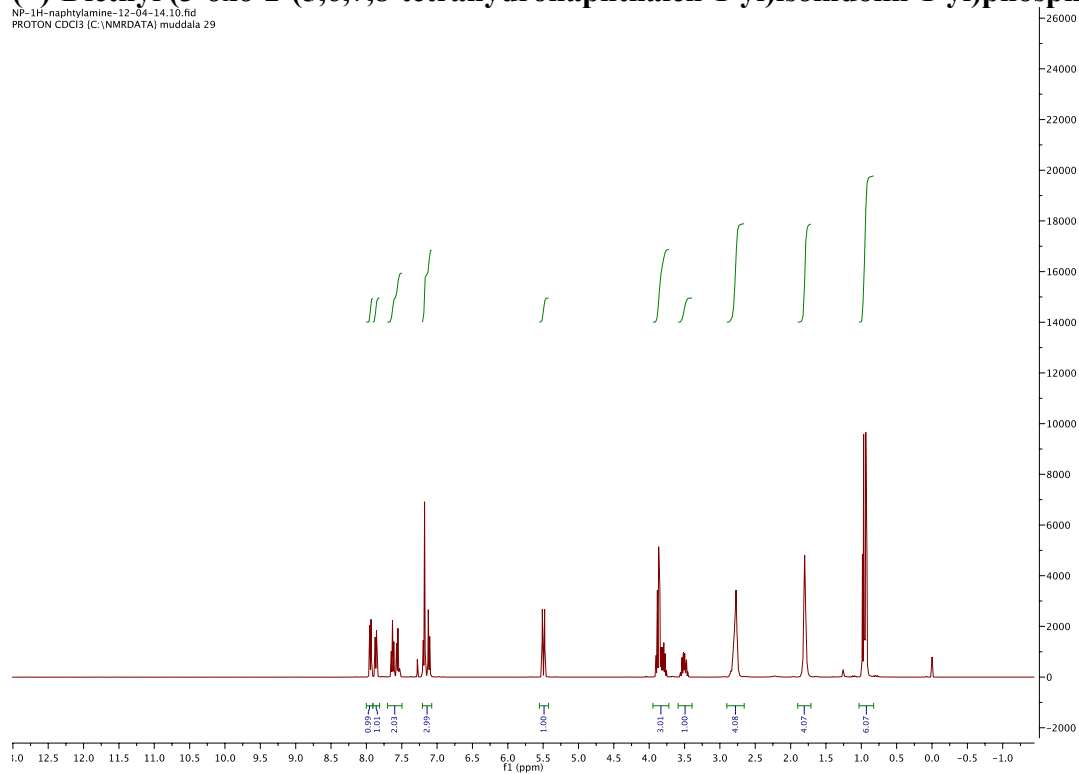

NP-13C-Naphthylamine-12-16-14.10.fid  
C13CPD32 CDCl3 [C:\NMRDATA] muddala 32

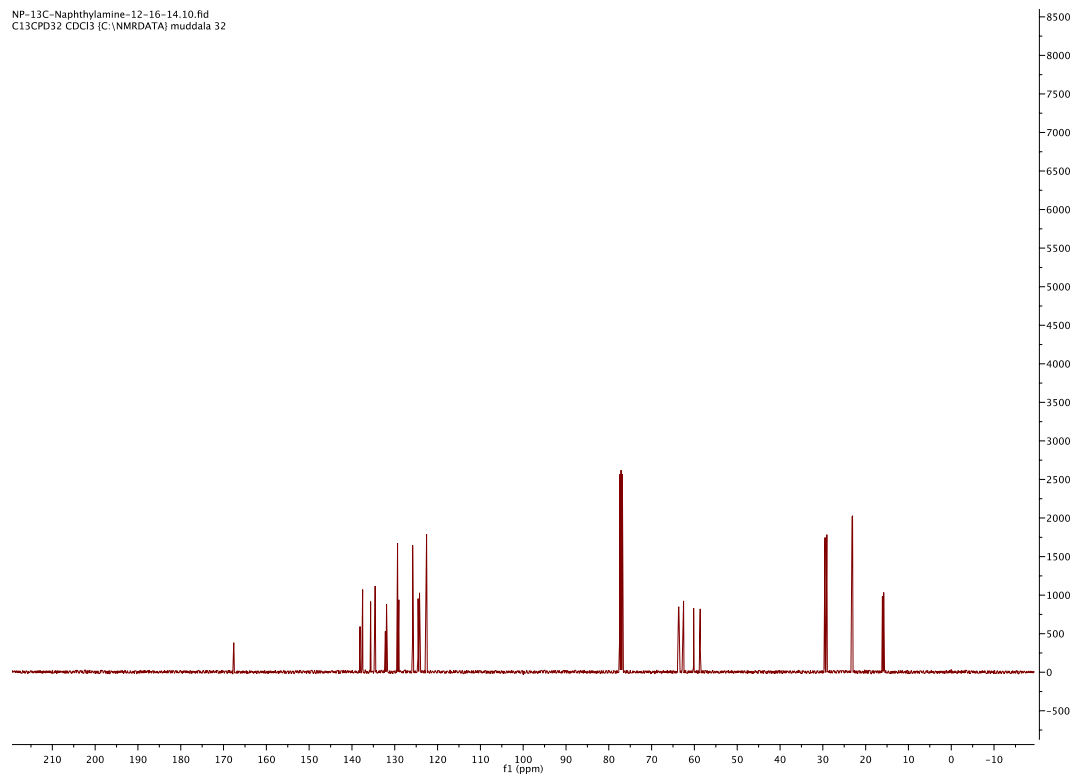

### (±)-Diethyl (2-isobutyl-3-oxoisoindolin-1-yl)phosphonate (3s):

NP\_1H-Isobutyl-12-03-14.10.fid  
PROTON CDCl3 (C:\NMRDATA) muddala 31

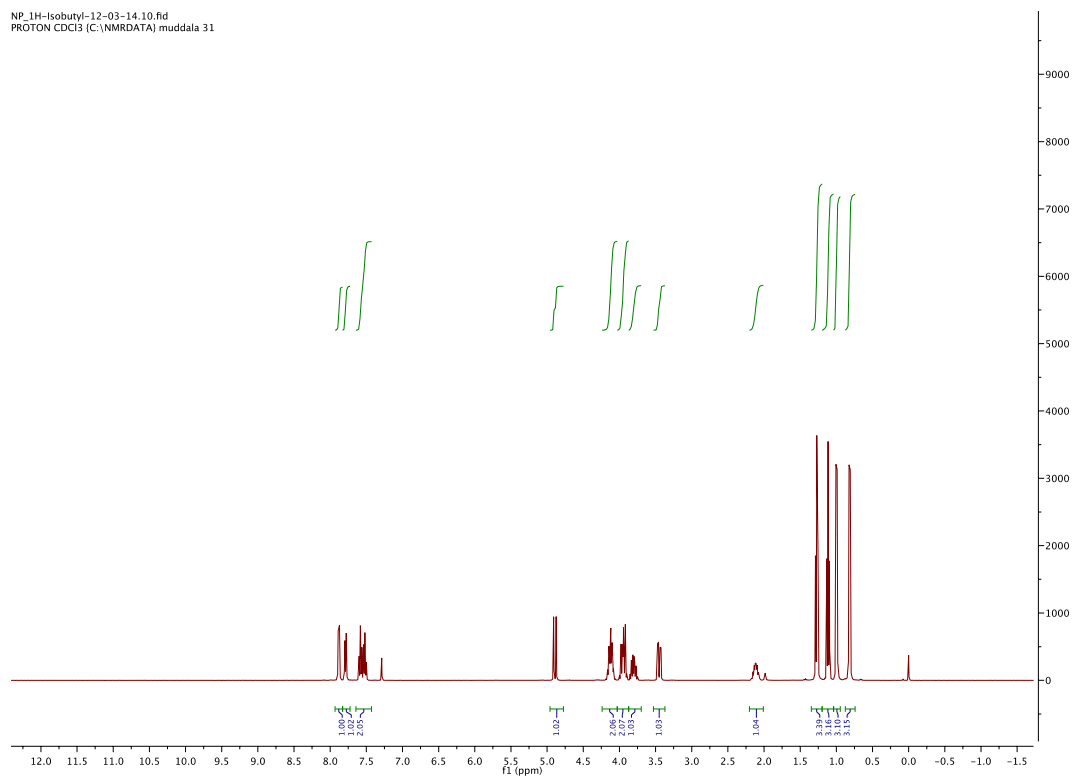

NP-13C-Isobutyl-12-03-14.10.fid  
C13CPD32 CDCl3 (C:\NMRDATA) muddala 31

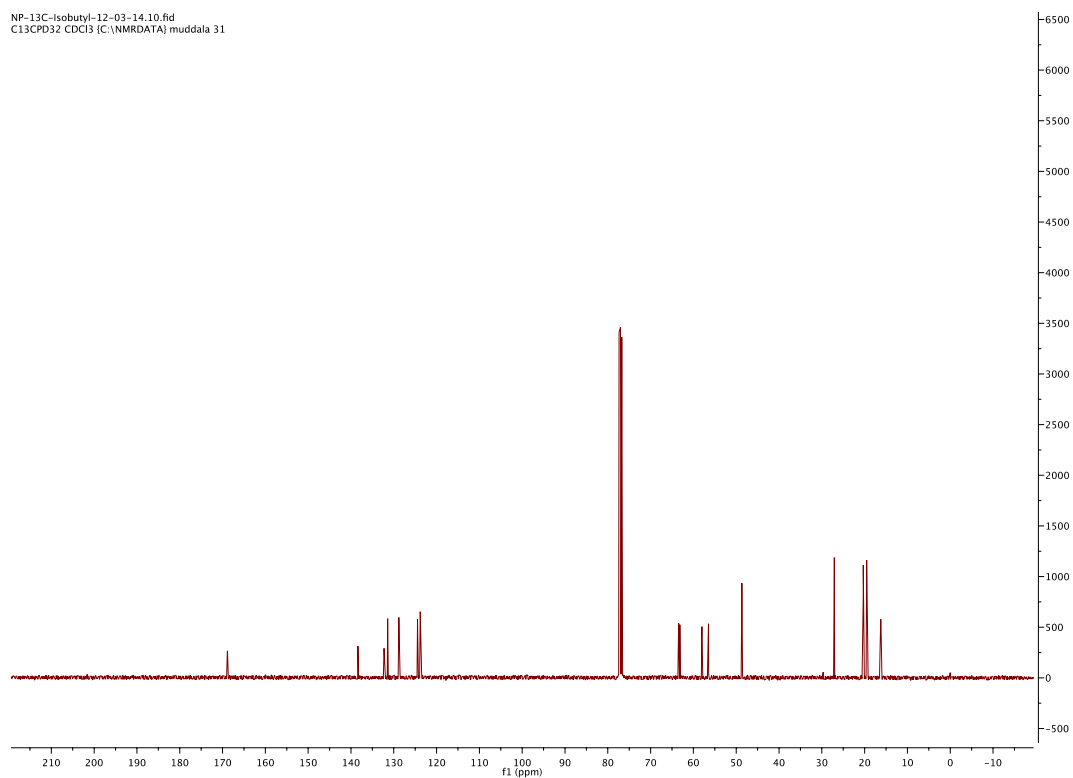

**(±)-Diethyl (2-hexyl-3-oxoisindolin-1-yl)phosphonate (3t):**

NP-1H-n-hexylphosphonate-12-01-14.10.fid  
PROTON CDCl3 [C:\NMRDATA] muddala 22

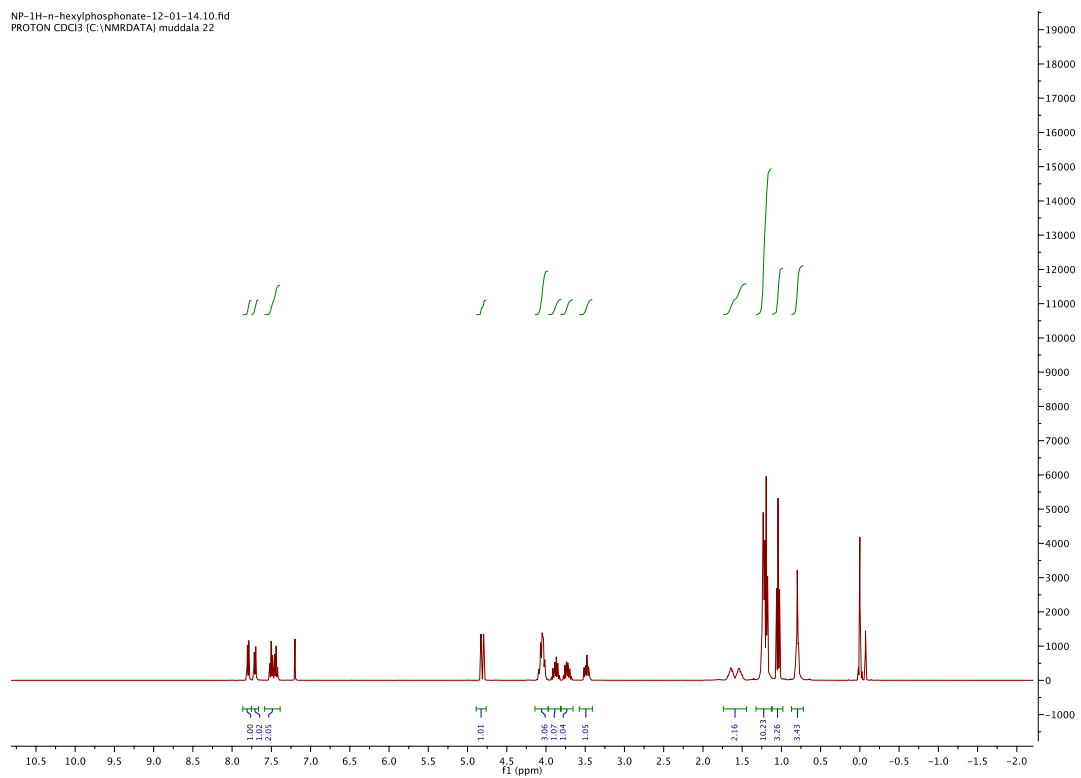

NP-13C-n-hexylphosphonate-12-01-14.10.fid  
C13CPD32 CDCl3 [C:\NMRDATA] muddala 22

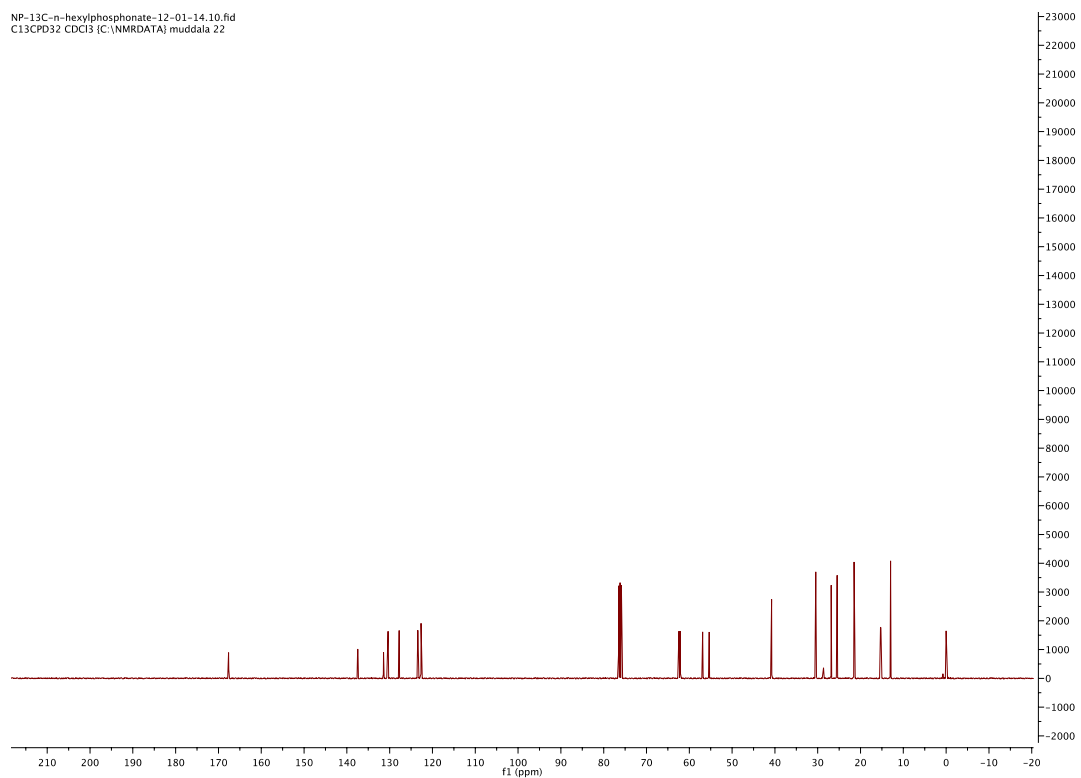

**(±)-Diethyl (2-allyl-3-oxoisindolin-1-yl)phosphonate (3u):**



NP-1H-allyl-12-02-14.10.fid  
PROTON CDCl3 (C:\NMRDATA) muddala 51

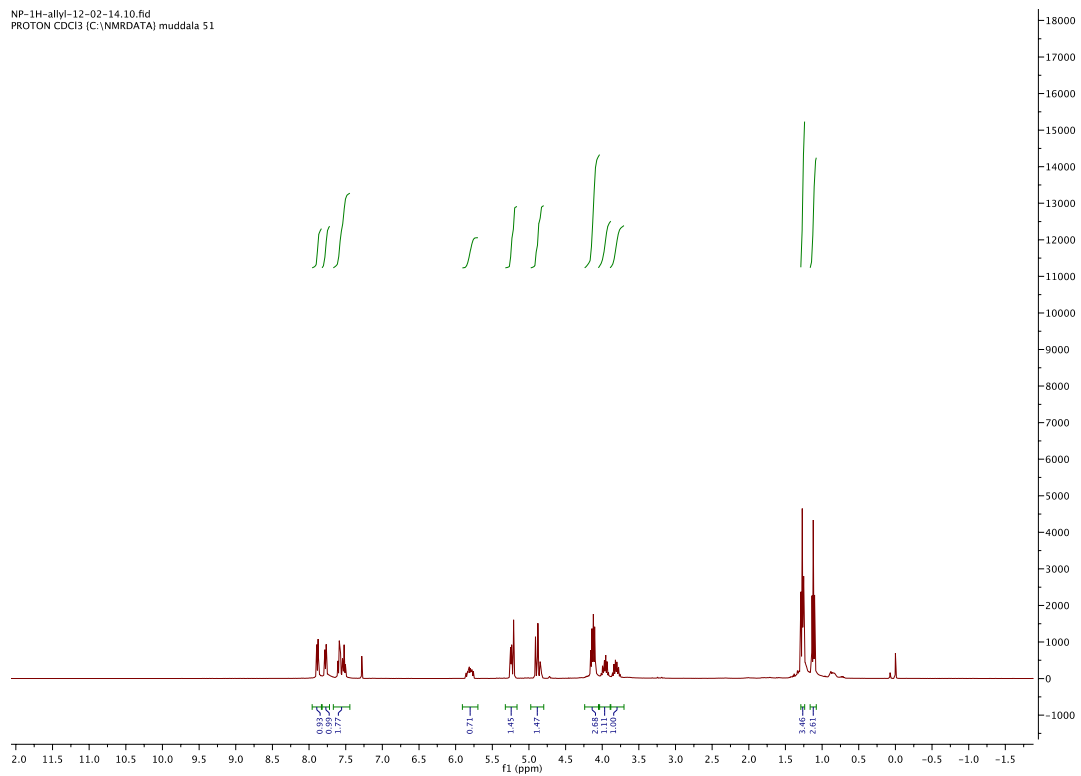

NP-3CH-Allylphosphonate.10.fid  
C13CPD CDCl3 (C:\NMRDATA) muddala 36

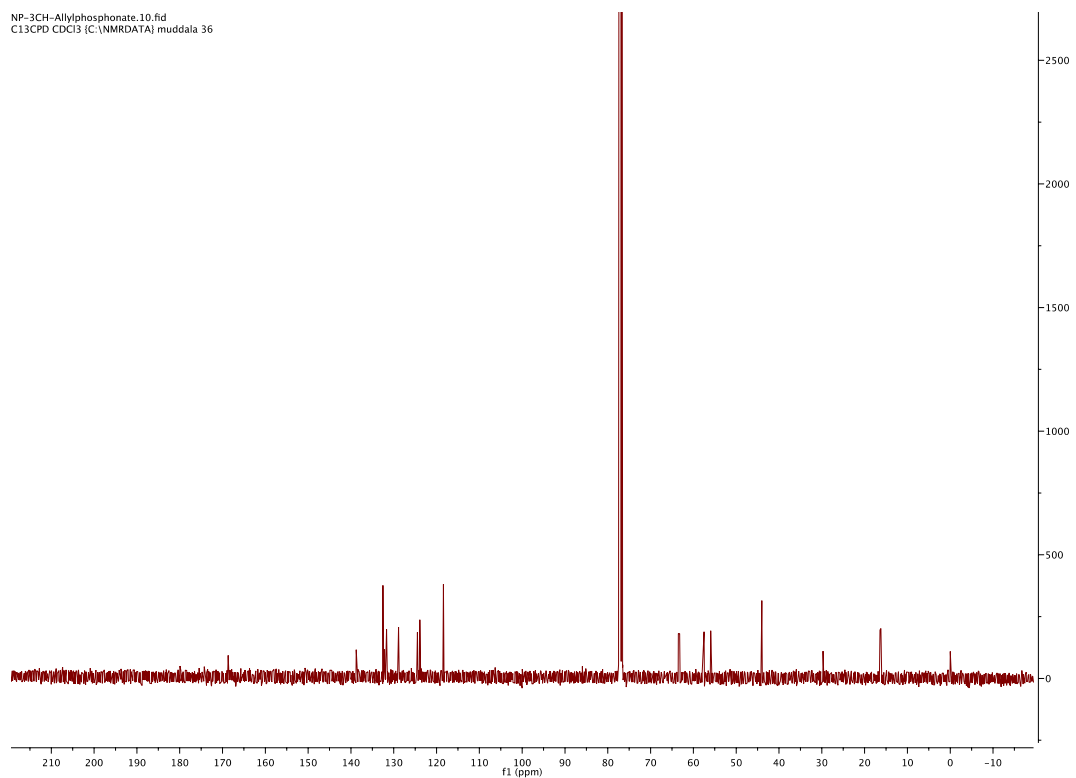

**(±)-Diethyl (2-cyclopropyl-3-oxoisindolin-1-yl)phosphonate (3v):**

NP-1H-cyclopropyl-12-01-14.10.fid  
PROTON CDCl3 (C:\NMRDATA) muddala 33

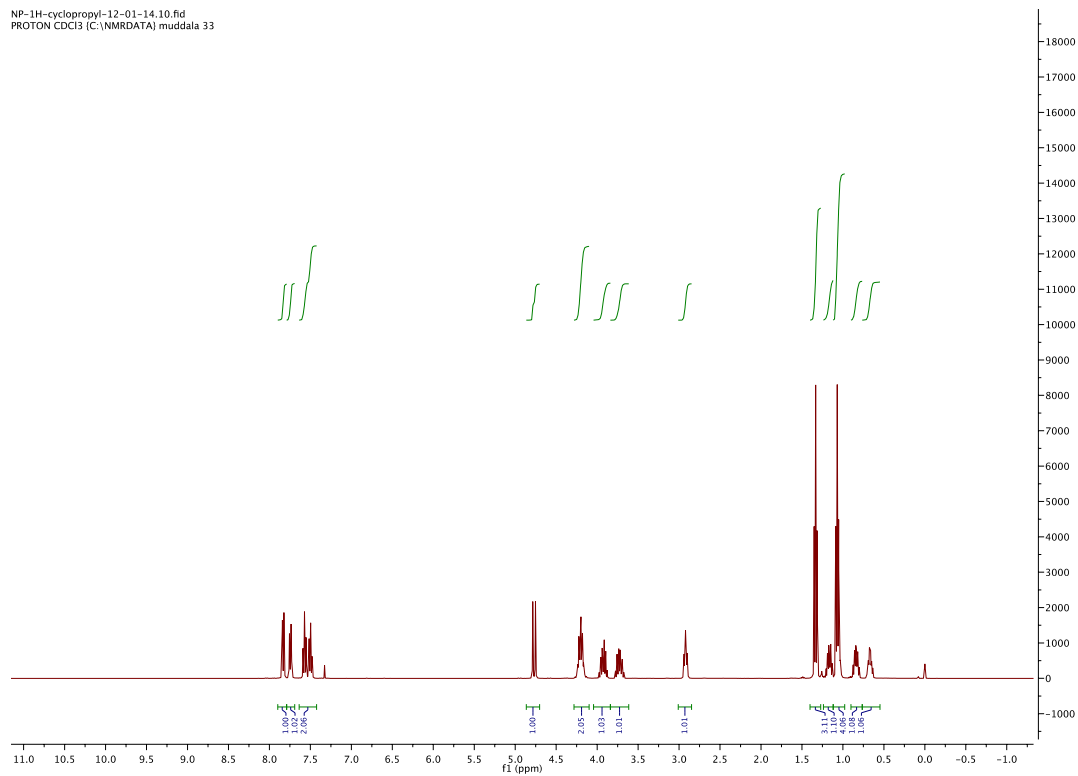

NP-13C-cyclopropyl-12-01-14.10.fid  
C13CPD CDCl3 (C:\NMRDATA) muddala 33

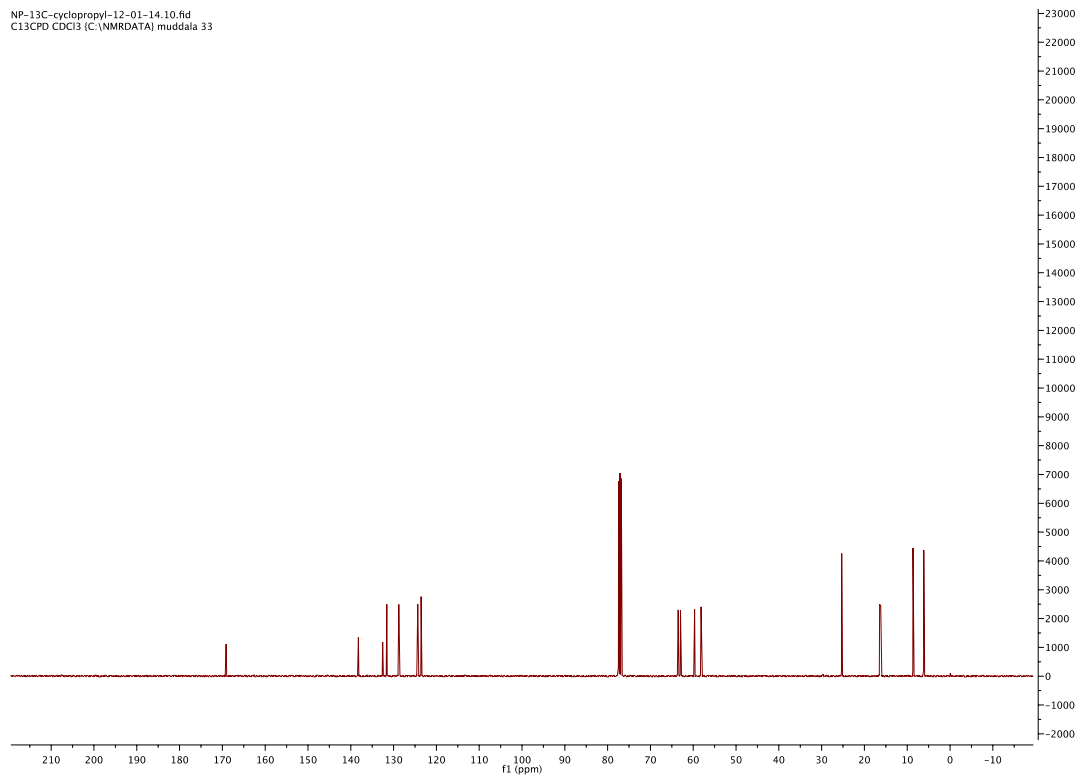

**(±)-Diethyl (2-cyclohexyl-3-oxoisindolin-1-yl)phosphonate (3w):**

NP-1H-cyclohexylphosphate-11-30-14.10.fid  
PROTON CDCl3 (C:\NMRDATA) muddala 34

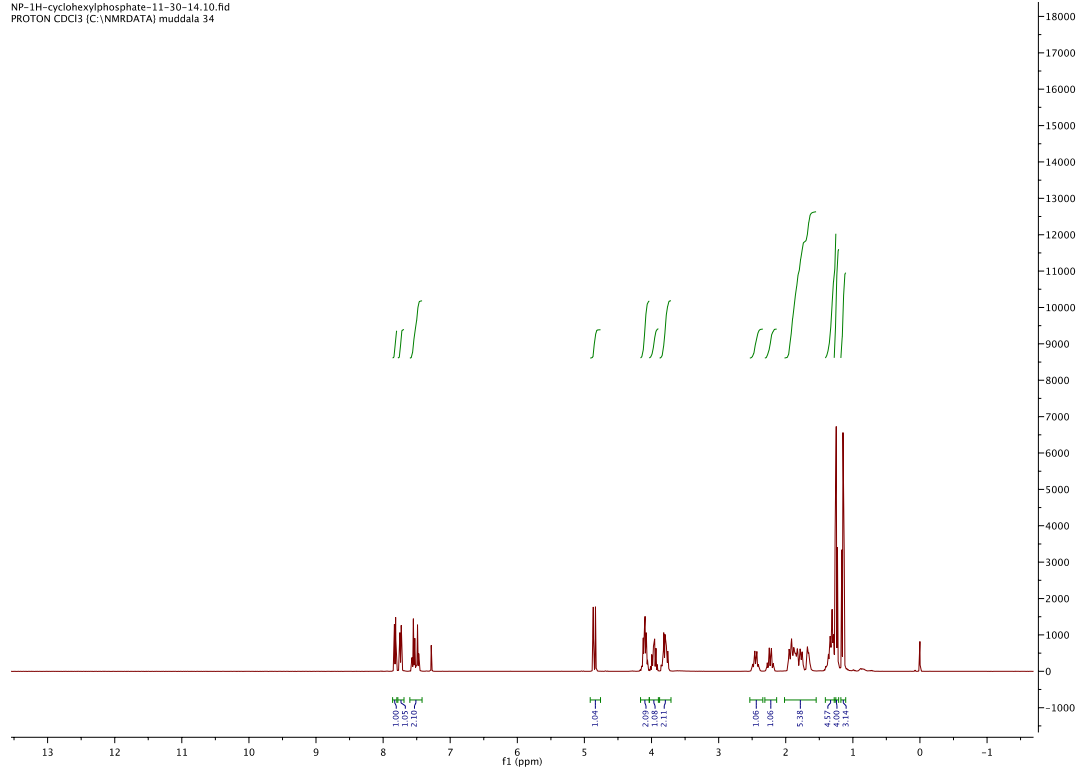

NP-13C-cyclohexylphosphate-11-30-14.10.fid  
C13CPD CDCl3 (C:\NMRDATA) muddala 34

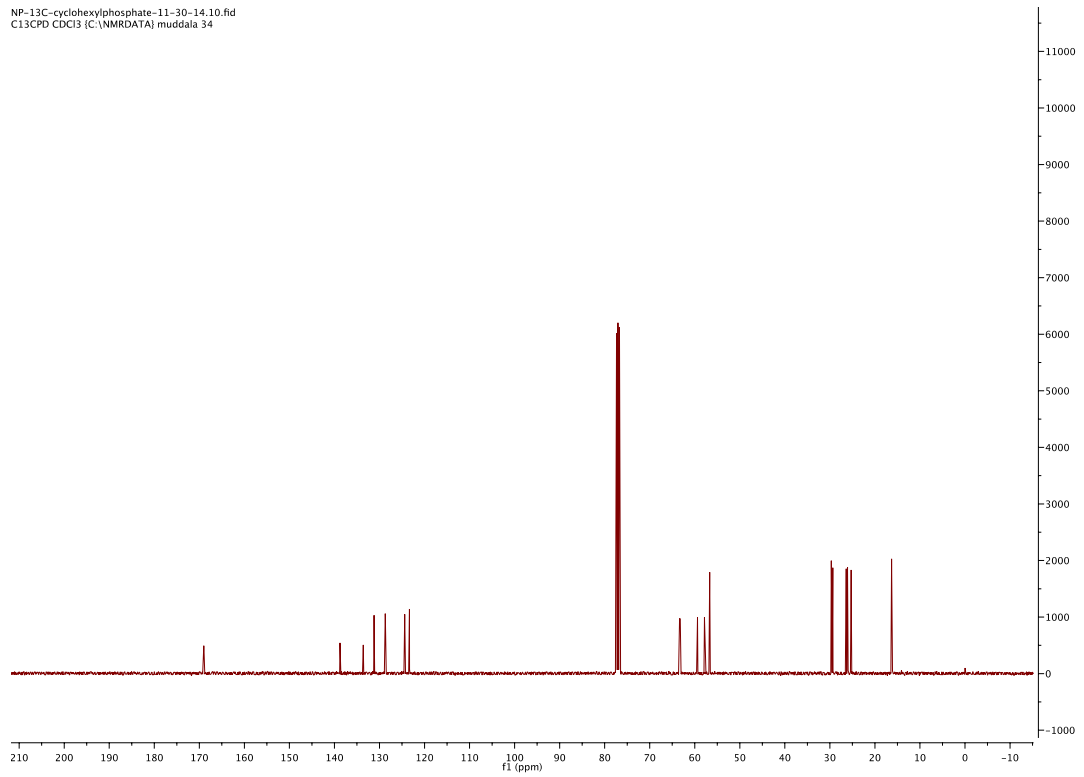

Supplement: c5ra02307f1.pdf [file c5ra02307f1.pdf]
